# Supplementary material for: Predicting viable isomers of [X,C,N] and [H,X,C,N] (X = Sn, Pb)
Source: Royal Society of Chemistry journal article supplement (doi:10.1039/c9ra08943h), 2019-01-01

Supporting Information available for  
Predicting viable isomers of [X,C,N] and [H,X,C,N] (X=Sn, Pb)

Yu-wang Sun,<sup>a</sup> Hai-yan Wang<sup>\*a,b</sup> and Yi-hong Ding<sup>\*a</sup>

<sup>a</sup> Institute of Theoretical Chemistry,  
Jilin University, Changchun 130023,  
People's Republic of China

<sup>b</sup> College of Computer Science and Technology,  
Changchun University, Changchun 130023,  
People's Republic of China

For submission to:

RSC Advances

## Table of Contents

1. Theoretical methods.
2. Table S1 The comparison of the relative energies (in kcal/mol) have been computed through two methods. All the energies were corrected by zero-point energies.
3. Fig. S1-S4 Optimized geometries of isomers of the doublet/quartet [X,C,N] and singlet/triplet [H,X,C,N] (X=Sn, Pb) at the B3LYP/def2-qzvpp level. Bond lengths are in angstroms and angles are in degrees.
4. Table S2-3 Charge analysis (q, |e|) of  ${}^2\text{XCN}$ ,  ${}^2\text{XNC}$ ,  ${}^1\text{HXCN}$  and  ${}^1\text{HXNC}$  (X=Sn, Pb) at the B3LYP/def2-QZVPP level.
5. Table S4 The T1 diagnostic values and total (a.u.) and relative (kcal/mol) energies of the doublet/quartet [X,C,N] and singlet/triplet [H,X,C,N] (X=Sn, Pb) structures and transition states at B3LYP/def2-qzvpp and single-point CCSD(T)/def2-qzvpp//B3LYP/def2-qzvpp with inclusion of B3LYP/def2-qzvpp zero-point vibrational energies (ZPVE).
6. Table S5-6 Harmonic vibrational frequencies ( $\text{cm}^{-1}$ ), infrared intensities ( $\text{km/mol}$ ) (in parentheses), dipole moment (Debye), and rotational constants (GHZ) of doublet/doublet [X,C,N] and singlet/triplet [H,X,C,N] (X=Sn, Pb) at the B3LYP/def2-qzvpp level.
7. Fig. S5 Schematic potential energy surfaces of quartet [X,C,N] (X=Sn, Pb) at the level of CCSD(T)/def2-QZVPP//B3LYP/def2-QZVPP+ZPVE in the parentheses.
8. Table S7 Selected standard bond distances (r) (in Å) of reference molecules.
9. Table S8 Cartesian coordinates of doublet/doublet [X,C,N] and singlet/triplet [H,X,C,N] (X=Sn, Pb) structures and transition states at the B3LYP/def2-QZVP level of theory.

## 1. Theoretical methods

GPESS: The GPESS platform includes isomer search and transition state search. The isomer search was based on the grid search program. The transition state search was divided into two types, one is the isomer conversion and the other is the isomer decomposition. For the interconversion TS search, the "QST2" algorithm was applied, which yet has a difficulty in placing atoms in the same atomic order between reactant and product (especially for molecules with many homo-atomic elements). This was treated in GPESS by automatic enumeration of all possible combinations. Besides, the decomposition TS search was considered directing to some relatively stable molecular fragments like N<sub>2</sub>, CO<sub>2</sub> and NO.

## 2.

Table S1 Computed relative energies (in kcal/mol) at CCSD(T)/def2-QZVPP//B3LYP/def2-QZVPP+ZPVE and CCSD(T)/def2-QZVPP//PBE0/def2-QZVPP+ZPVE levels. "ZPVE" denote the zero-point vibrational energy.

| Species                       | CCSD(T)/def2-QZVPP//B3LYP/def2-QZVPP + ZPVE | CCSD(T)/def2-QZVPP//PBE0/def2-QZVPP + ZPVE | Error | Average error |
|-------------------------------|---------------------------------------------|--------------------------------------------|-------|---------------|
| SnCN <sup>21</sup>            | 0.00                                        | 0.00                                       | 0.00  | 0.0000        |
| SnNC <sup>22</sup>            | 4.89                                        | 4.87                                       | -0.02 | 0.0004        |
| CSnN <sup>23</sup>            | 174.68                                      | 175.14                                     | 0.46  | 0.0093        |
| SnCN <sup>41</sup>            | 64.63                                       | 64.67                                      | 0.05  | 0.0009        |
| SnNC <sup>42</sup>            | 84.92                                       | 80.67                                      | -4.25 | 0.0849        |
| CSnN <sup>43</sup>            | 176.91                                      | 180.11                                     | 3.20  | 0.0640        |
| <i>c</i> -SnCN <sup>44</sup>  | 88.29                                       | 85.20                                      | -3.09 | 0.0617        |
|                               |                                             |                                            |       |               |
| PbCN <sup>21</sup>            | 0.00                                        | 0.00                                       | 0.00  | 0.0000        |
| PbNC <sup>22</sup>            | 6.40                                        | 6.25                                       | -0.14 | 0.0029        |
| CPbN <sup>23</sup>            | 184.98                                      | 185.37                                     | 0.40  | 0.0079        |
| PbCN <sup>41</sup>            | 81.54                                       | 81.16                                      | -0.39 | 0.0077        |
| PbNC <sup>42</sup>            | 84.97                                       | 85.20                                      | 0.23  | 0.0045        |
| CPbN <sup>43</sup>            | 187.29                                      | 186.98                                     | -0.31 | 0.0061        |
| <i>c</i> -PbCN <sup>44</sup>  | 87.03                                       | 88.19                                      | 1.16  | 0.0232        |
|                               |                                             |                                            |       |               |
| HSnCN <sup>11</sup>           | 0.00                                        | 0.00                                       | 0.00  | 0.0000        |
| HSnNC <sup>12</sup>           | 4.80                                        | 4.78                                       | -0.02 | 0.0004        |
| SnNCH <sup>13</sup>           | 34.86                                       | 34.87                                      | 0.02  | 0.0003        |
| NSnCH <sup>14</sup>           | 142.34                                      | 142.98                                     | 0.64  | 0.0127        |
| SnCNH <sup>15</sup>           | 30.82                                       | 30.85                                      | 0.03  | 0.0006        |
| CSnNH <sup>16</sup>           | 149.12                                      | 149.02                                     | -0.10 | 0.0020        |
| <i>c</i> -SnCHN <sup>17</sup> | 14.49                                       | 14.59                                      | 0.10  | 0.0020        |
| <i>c</i> -SnCNH <sup>18</sup> | 38.47                                       | 38.52                                      | 0.05  | 0.0010        |
| HSnCN <sup>31</sup>           | 35.69                                       | 35.77                                      | 0.08  | 0.0016        |
| HSnNC <sup>32</sup>           | 46.40                                       | 46.41                                      | 0.01  | 0.0002        |
| SnNCH <sup>33</sup>           | 20.53                                       | 20.89                                      | 0.36  | 0.0072        |

|                               |        |        |       |        |
|-------------------------------|--------|--------|-------|--------|
| NSnCH <sup>34</sup>           | 137.57 | 137.47 | -0.10 | 0.0020 |
| HNCSn <sup>35</sup>           | 25.07  | 24.99  | -0.08 | 0.0016 |
| CSnNH <sup>36</sup>           | 131.81 | 131.81 | 0.00  | 0.0000 |
| <i>c</i> -SnCHN <sup>37</sup> | 44.75  | 45.07  | 0.32  | 0.0064 |
| <i>c</i> -SnHNC <sup>38</sup> | 51.83  | 51.88  | 0.05  | 0.0010 |
| CSn(H)N <sup>39</sup>         | 194.28 | 196.49 | 2.21  | 0.0442 |
|                               |        |        |       |        |
| HPbCN <sup>11</sup>           | 0.00   | 0.00   | 0.00  | 0.0000 |
| HPbNC <sup>12</sup>           | 5.89   | 5.85   | -0.04 | 0.0008 |
| PbNCH <sup>13</sup>           | 32.55  | 33.09  | 0.54  | 0.0107 |
| HCPbN <sup>14</sup>           | 149.65 | 150.26 | 0.61  | 0.0122 |
| HNCpPb <sup>15</sup>          | 29.86  | 29.84  | -0.03 | 0.0005 |
| HNPbC <sup>16</sup>           | 151.76 | 152.21 | 0.46  | 0.0092 |
| <i>c</i> -PbCHN <sup>17</sup> | 14.78  | 14.73  | -0.05 | 0.0010 |
| <i>c</i> -PbCHN <sup>18</sup> | 37.30  | 37.12  | -0.18 | 0.0037 |
| CHPbN <sup>19</sup>           | 44.90  | 43.60  | -1.30 | 0.0260 |
| CHPbN <sup>110</sup>          | 58.30  | 58.73  | 0.43  | 0.0086 |
| PbNHC <sup>111</sup>          | 33.34  | 30.80  | -2.54 | 0.0508 |
| HPbCN <sup>31</sup>           | 47.29  | 47.26  | -0.02 | 0.0004 |
| HPbNC <sup>32</sup>           | 58.25  | 58.06  | -0.19 | 0.0038 |
| PbNCH <sup>33</sup>           | 14.39  | 14.70  | 0.31  | 0.0062 |
| NPbCH <sup>34</sup>           | 147.84 | 147.44 | -0.40 | 0.0080 |
| PbCNH <sup>35</sup>           | 20.50  | 20.95  | 0.45  | 0.0089 |
| CPbNH <sup>36</sup>           | 139.91 | 139.98 | 0.07  | 0.0014 |
| <i>c</i> -PbHNC <sup>37</sup> | 61.22  | 61.03  | -0.19 | 0.0038 |
| CPb(H)N <sup>38</sup>         | 210.97 | 213.65 | 2.68  | 0.0536 |

3.

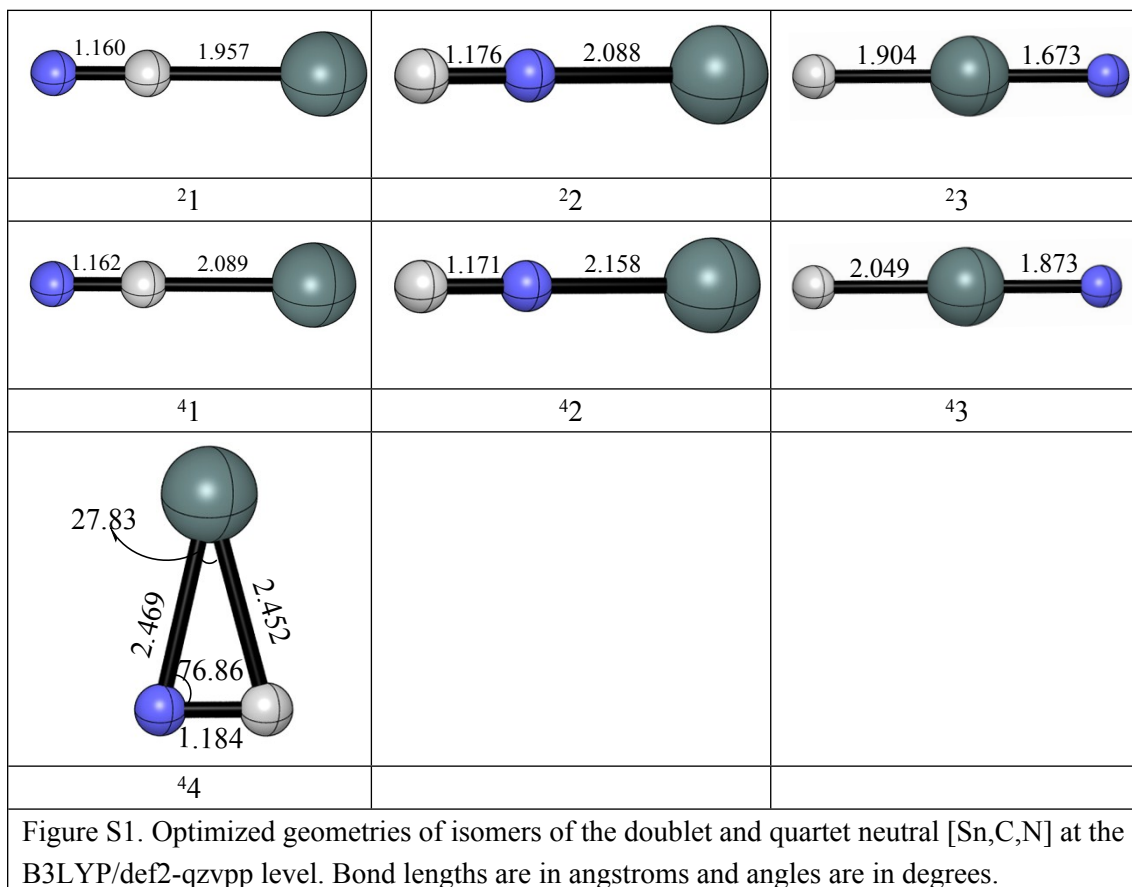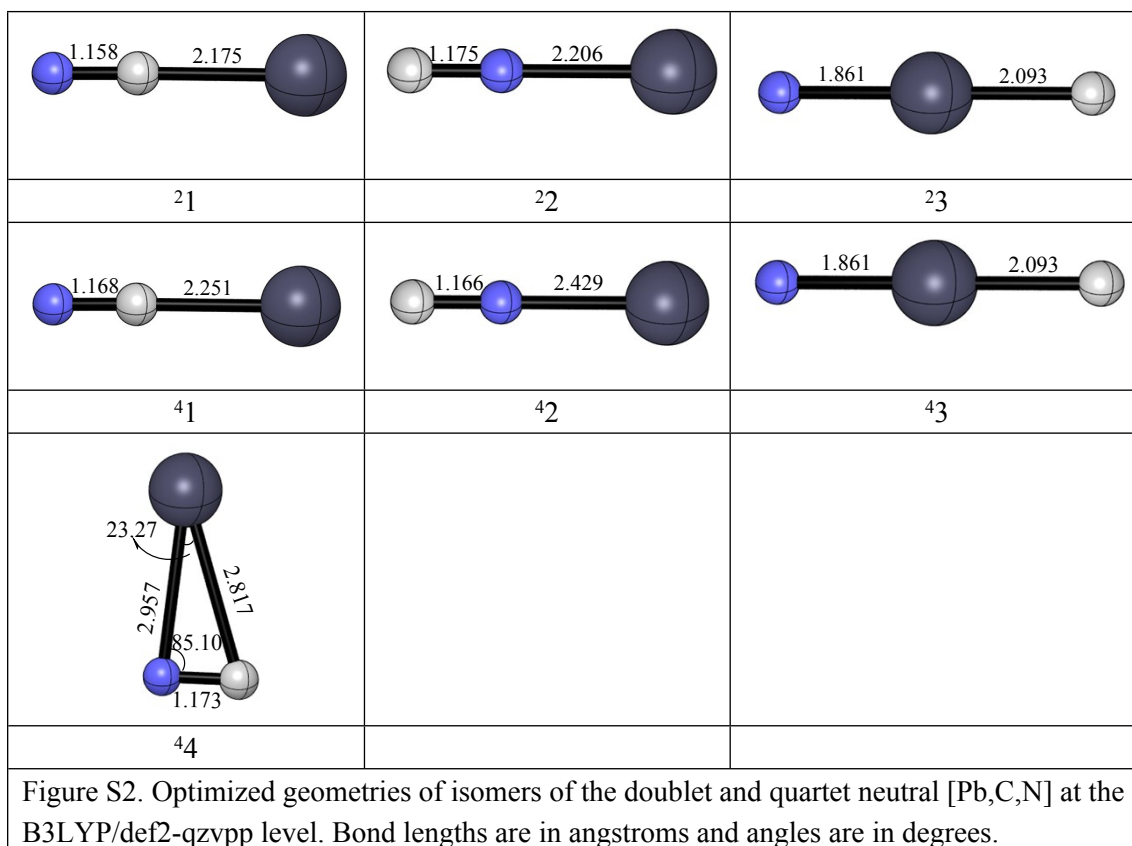

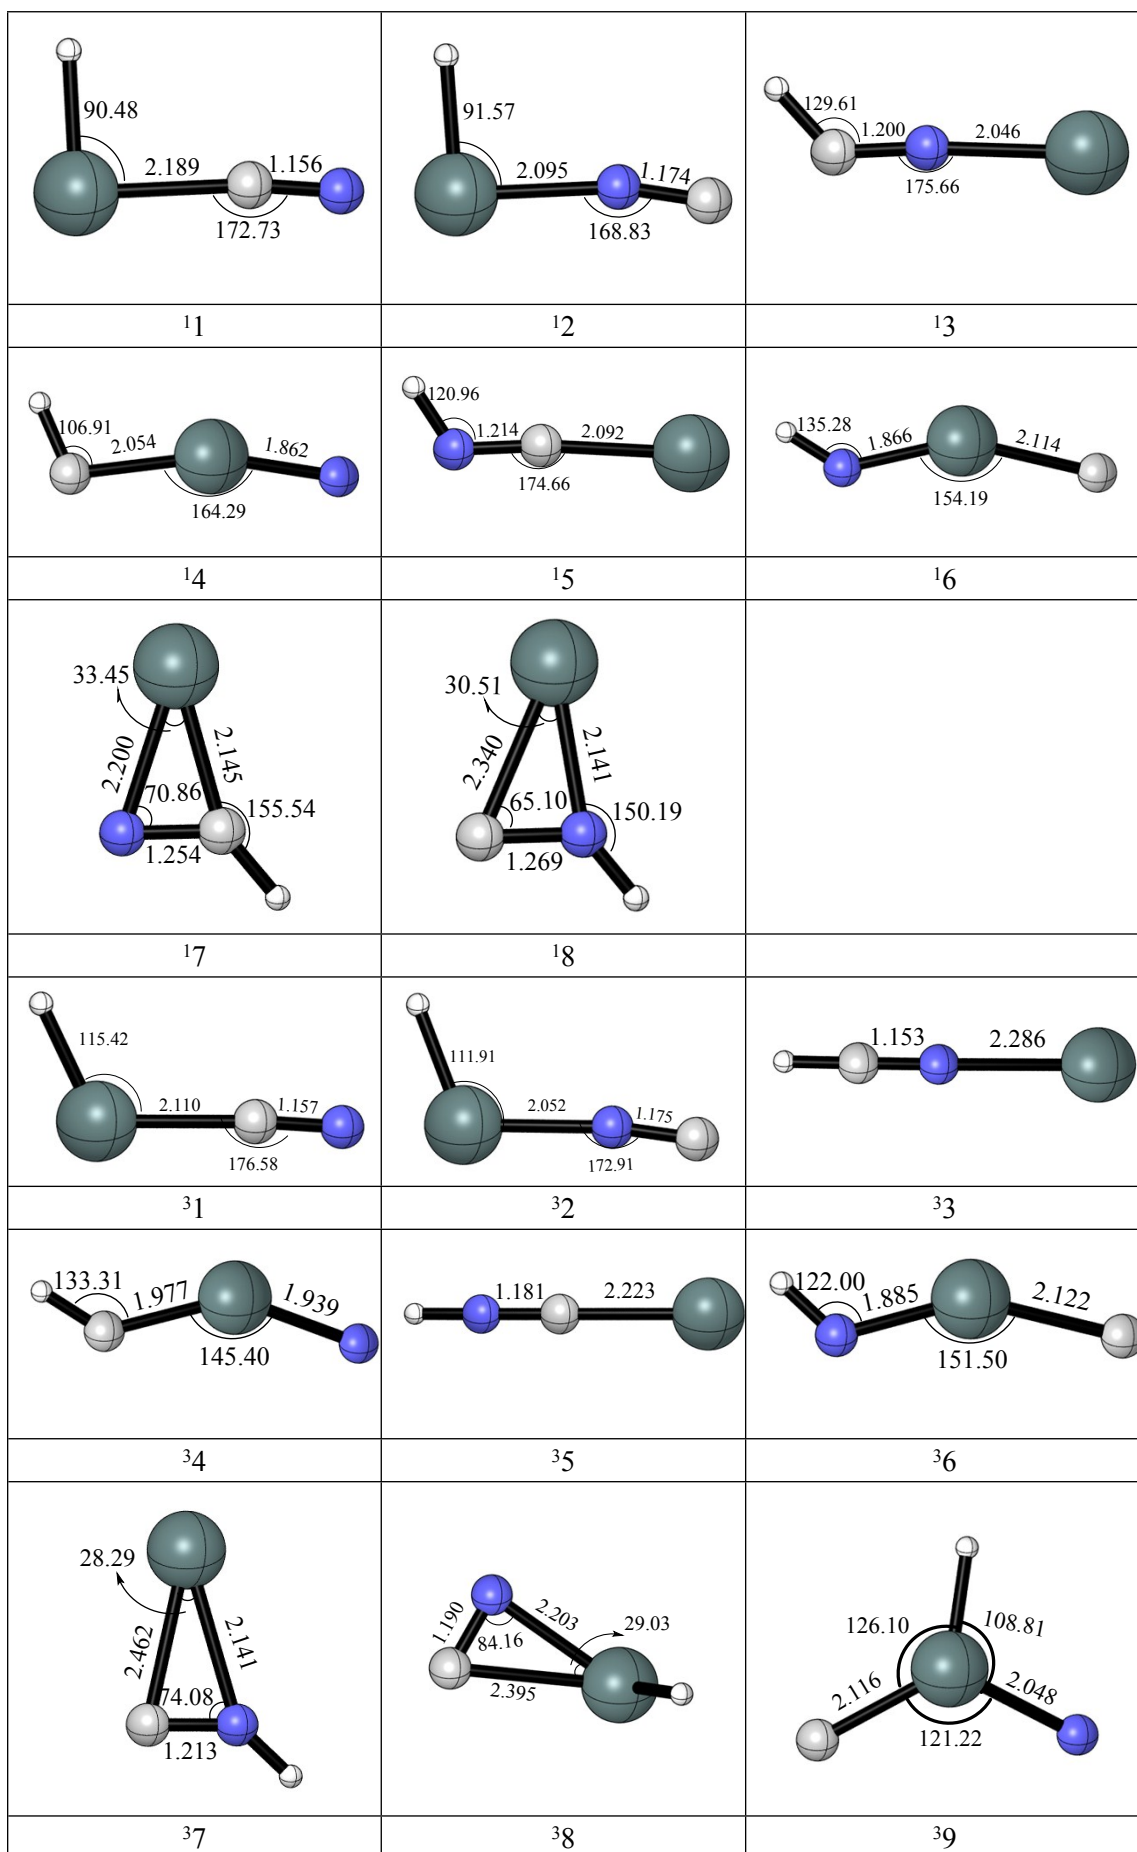

Figure S3. Optimized geometries of isomers of the singlet and triplet neutral [H,Sn,C,N] at the B3LYP/def2-qzvpp level. Bond lengths are in angstroms and angles are in degrees.

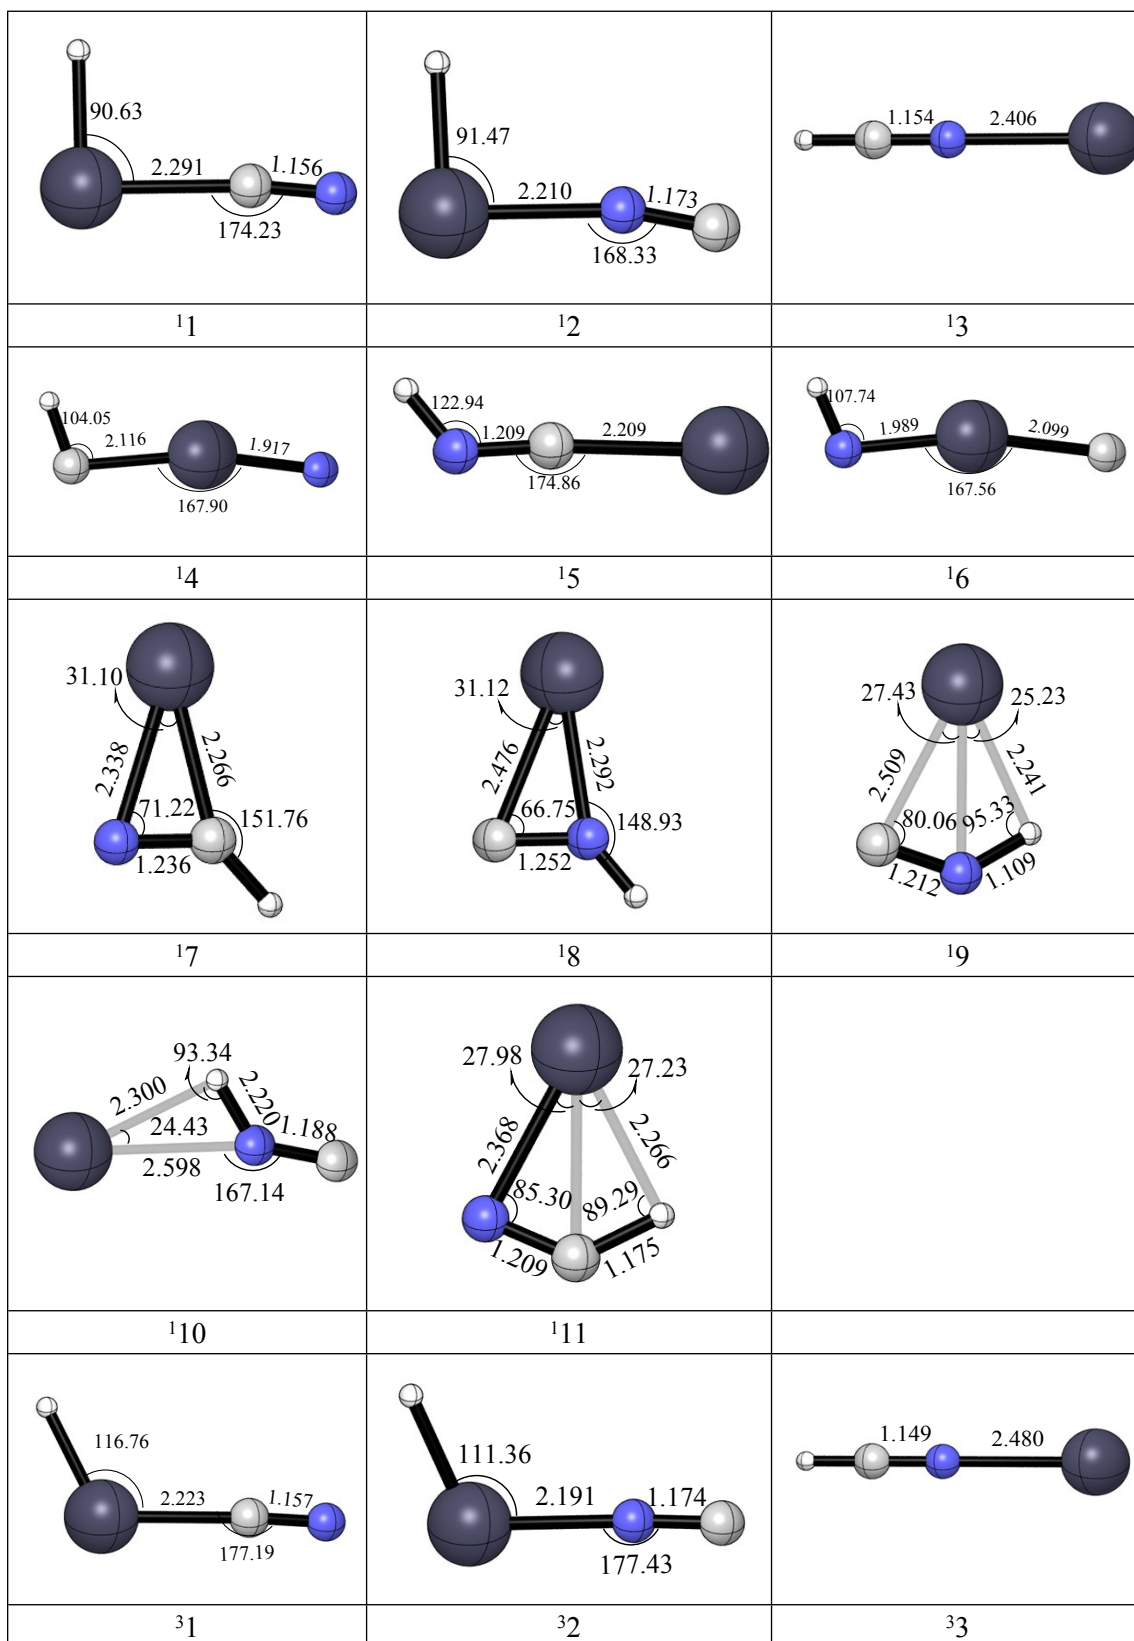

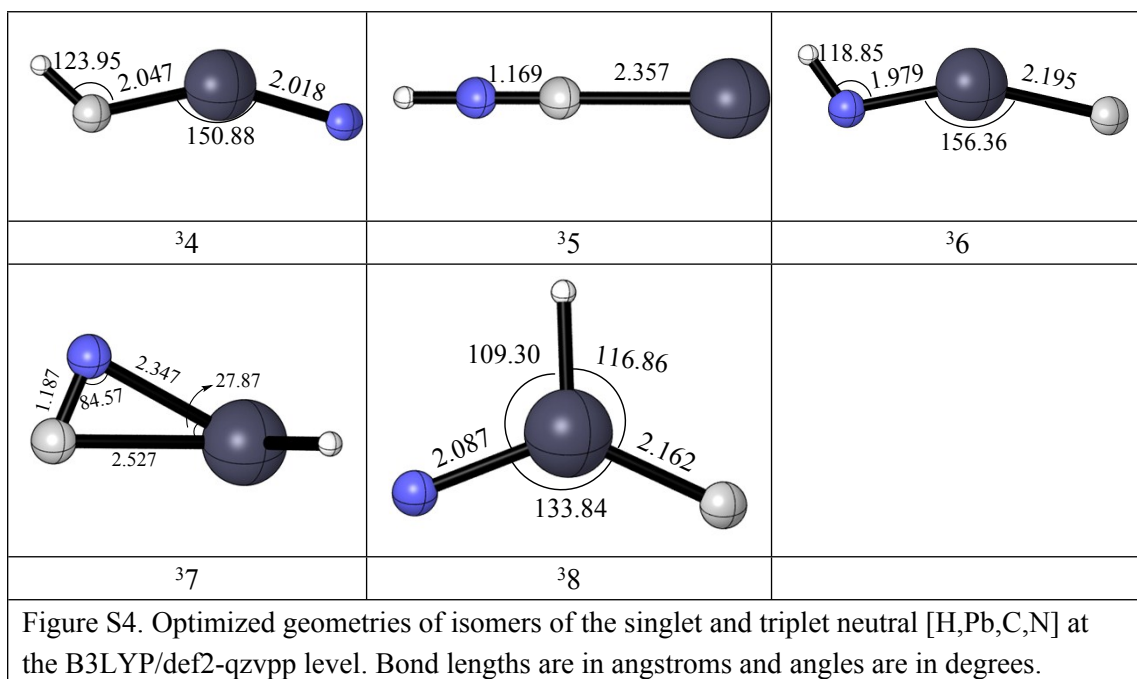

## 5.

Table S2 Charge analysis (q, |e|) of <sup>2</sup>XCN and <sup>2</sup>XNC (X=Sn, Pb) at the B3LYP/def2-QZVPP level.

| Speices             | q(X)  |           |       |
|---------------------|-------|-----------|-------|
|                     | NPA   | Hirshfeld | ADCH  |
| SiCN <sup>2</sup> 1 | 0.647 | 0.260     | 0.208 |
| GeCN <sup>2</sup> 1 | 0.626 | 0.292     | 0.251 |
| SnCN <sup>2</sup> 1 | 0.670 | 0.340     | 0.308 |
| PbCN <sup>2</sup> 1 | 0.672 | 0.378     | 0.356 |
| SiNC <sup>2</sup> 2 | 0.771 | 0.248     | 0.191 |
| GeNC <sup>2</sup> 2 | 0.743 | 0.298     | 0.257 |
| SnNC <sup>2</sup> 2 | 0.785 | 0.360     | 0.327 |
| PbNC <sup>2</sup> 2 | 0.789 | 0.411     | 0.402 |

Table S3 Charge analysis (q, |e|) of <sup>1</sup>HXCN and <sup>1</sup>HXNC (X=Sn, Pb) at the B3LYP/def2-QZVPP level.

| Speices              | q(X)  |           |       | q(H)   |           |        |
|----------------------|-------|-----------|-------|--------|-----------|--------|
|                      | NPA   | Hirshfeld | ADCH  | NPA    | Hirshfeld | ADCH   |
| HSiCN <sup>1</sup> 1 | 0.814 | 0.331     | 0.151 | -0.271 | -0.087    | 0.032  |
| HGeCN <sup>2</sup> 1 | 0.791 | 0.372     | 0.233 | -0.262 | -0.095    | 0.000  |
| HSnCN <sup>1</sup> 1 | 0.670 | 0.449     | 0.341 | -0.335 | -0.123    | -0.053 |
| HPbCN <sup>1</sup> 1 | 0.946 | 0.503     | 0.458 | -0.341 | -0.138    | -0.106 |
| HSiNC <sup>1</sup> 2 | 0.985 | 0.335     | 0.142 | -0.303 | -0.099    | 0.030  |
| HGeNC <sup>1</sup> 2 | 0.965 | 0.398     | 0.264 | -0.293 | -0.105    | -0.005 |
| HSnNC <sup>1</sup> 2 | 0.672 | 0.484     | 0.386 | -0.363 | -0.131    | -0.058 |
| HPbNC <sup>1</sup> 2 | 1.113 | 0.548     | 0.519 | -0.370 | -0.145    | -0.112 |



## 5.

Table S4 Relative (kcal/mol) energies of doublet/quartet [X,C,N] and singlet/triplet [H, X,C,N] (X=Sn, Pb) structures and transition states at B3LYP/def2-qzvpp and single-point CCSD(T)/def2-qzvpp//B3LYP/ def2-qzvpp with inclusion of B3LYP/def2-qzvpp zero-point vibrational energies (ZPVE). We have also performed the T1 diagnostics of the relevant structures.

| Species                               | SP+ZPVE | T1 diagnostics |
|---------------------------------------|---------|----------------|
| SnCN <sup>2</sup> 1                   | 0.00    | 0.020910       |
| SnNC <sup>2</sup> 2                   | 4.89    | 0.017288       |
| CSnN <sup>2</sup> 3                   | 174.68  | 0.074056       |
| <sup>2</sup> ts1/2( <sup>2</sup> A')  | 12.89   | 0.019953       |
| <sup>2</sup> ts1/2( <sup>2</sup> A'') | 11.31   | 0.017178       |
| <sup>2</sup> ts2/3                    | 174.31  | 0.103724       |
| SnCN <sup>4</sup> 1                   | 64.63   | 0.033058       |
| SnNC <sup>4</sup> 2                   | 84.92   | 0.062725       |
| CSnN <sup>4</sup> 3                   | 176.91  | 0.075432       |
| <i>c</i> -SnCN <sup>4</sup> 4         | 88.29   | 0.048961       |
| <sup>4</sup> ts1/4                    | 91.65   | 0.058735       |
| <sup>4</sup> ts2/4                    | 87.91   | 0.053939       |
| <sup>4</sup> ts3/4                    | 189.98  | 0.074052       |
| <sup>3</sup> Sn+CN                    | 94.44   |                |
| <sup>3</sup> C+ <sup>2</sup> SnN      | 255.56  |                |
| <sup>4</sup> N+ <sup>3</sup> SnC      | 201.78  |                |
|                                       |         |                |
| PbCN <sup>2</sup> 1                   | 0.00    | 0.016669       |
| PbNC <sup>2</sup> 2                   | 6.40    | 0.014678       |
| CPbN <sup>2</sup> 3                   | 184.98  | 0.064738       |
| <sup>2</sup> ts1/2( <sup>2</sup> A')  | 11.21   | 0.016513       |
| <sup>2</sup> ts1/2( <sup>2</sup> A'') | 10.05   | 0.014451       |
| <sup>4</sup> ts2/3                    | 199.76  | 0.059523       |
| PbCN <sup>4</sup> 1                   | 81.54   | 0.039748       |
| PbNC <sup>4</sup> 2                   | 84.97   | 0.057624       |
| CPbN <sup>4</sup> 3                   | 187.29  | 0.045168       |
| <i>c</i> -PbCN <sup>4</sup> 4         | 87.03   | 0.065802       |
| <sup>4</sup> ts1/4                    | 90.81   | 0.087195       |
| <sup>4</sup> ts2/4                    | 87.72   | 0.053939       |
| <sup>4</sup> ts3/4                    | 195.70  | 0.043516       |
| <sup>3</sup> Pb+ <sup>2</sup> CN      | 92.27   |                |
| <sup>3</sup> C+ <sup>2</sup> PbN      | 239.86  |                |
| <sup>4</sup> N+ <sup>3</sup> PbC      | 196.87  |                |
|                                       |         |                |
| HSnCN <sup>1</sup> 1                  | 0.00    | 0.015488       |

|                               |        |          |
|-------------------------------|--------|----------|
| HSnNC <sup>12</sup>           | 4.80   | 0.016519 |
| SnNCH <sup>13</sup>           | 34.86  | 0.023648 |
| NSnCH <sup>14</sup>           | 142.34 | 0.055991 |
| SnCNH <sup>15</sup>           | 30.82  | 0.021294 |
| CSnNH <sup>16</sup>           | 149.12 | 0.038119 |
| <i>c</i> -SnCHN <sup>17</sup> | 14.49  | 0.017605 |
| <i>c</i> -SnCNH <sup>18</sup> | 38.47  | 0.019142 |
| <sup>1</sup> ts1/2            | 11.68  | 0.016984 |
| <sup>1</sup> ts1/5            | 69.01  | 0.032203 |
| <sup>1</sup> ts1/7            | 51.68  | 0.015046 |
| <sup>1</sup> ts1/8            | 54.89  | 0.021183 |
| <sup>1</sup> ts2/3            | 81.02  | 0.027609 |
| <sup>1</sup> ts2/7            | 148.10 | 0.106016 |
| <sup>1</sup> ts2/7*           | 38.90  | 0.022693 |
| <sup>1</sup> ts2/8            | 64.61  | 0.017778 |
| <sup>1</sup> ts3/7            | 46.14  | 0.027845 |
| <sup>1</sup> ts4/6            | 192.66 | 0.130865 |
| <sup>1</sup> ts4/7            | 168.67 | 0.101718 |
| <sup>1</sup> ts5/8            | 53.10  | 0.025387 |
| <sup>1</sup> ts6/8            | 150.71 | 0.061488 |
| <sup>1</sup> ts7/8            | 76.30  | 0.021286 |
| <sup>1</sup> Sn+HCN           | 50.12  |          |
| <sup>1</sup> Sn+HNC           | 64.40  |          |
| HSnCN <sup>31</sup>           | 35.69  | 0.024380 |
| HSnNC <sup>32</sup>           | 46.40  | 0.020783 |
| SnNCH <sup>33</sup>           | 20.53  | 0.025424 |
| NSnCH <sup>34</sup>           | 137.57 | 0.063966 |
| HNCsSn <sup>35</sup>          | 25.07  | 0.022733 |
| CSnNH <sup>36</sup>           | 131.81 | 0.089649 |
| <i>c</i> -SnCHN <sup>37</sup> | 44.75  | 0.022227 |
| <i>c</i> -SnHNC <sup>38</sup> | 51.83  | 0.021422 |
| CSn(H)N <sup>39</sup>         | 194.28 | 0.096351 |
| <sup>3</sup> ts1/3            | 58.50  | 0.032684 |
| <sup>3</sup> ts1/8            | 53.01  | 0.022197 |
| <sup>3</sup> ts2/3            | 65.04  | 0.025180 |
| <sup>3</sup> ts2/7            | 67.78  | 0.022420 |
| <sup>3</sup> ts2/8            | 51.96  | 0.021025 |
| <sup>3</sup> ts3/5            | 60.48  | 0.029897 |
| <sup>3</sup> ts4/9            | 194.96 | 0.070548 |
| <sup>3</sup> ts5/7            | 48.82  | 0.020075 |
| <sup>3</sup> ts6/9            | 205.60 | 0.088033 |
| <sup>3</sup> ts6/7            | 142.41 | 0.057099 |
| <sup>3</sup> ts8/9            | 196.46 | 0.090130 |

|                            |        |          |
|----------------------------|--------|----------|
| $^3\text{Sn}+\text{HCN}$   | 31.57  |          |
| $^3\text{Sn}+\text{HNC}$   | 45.84  |          |
| $^2\text{CH}+^2\text{SnN}$ | 187.79 |          |
| $^3\text{NH}+^3\text{SnC}$ | 187.48 |          |
| $^2\text{H}+^2\text{CSnN}$ | 237.32 |          |
| $\text{HSn}+\text{CN}$     | 97.30  |          |
| $^2\text{H}+^2\text{SnCN}$ | 62.63  |          |
| $^2\text{H}+^2\text{SnNC}$ | 67.52  |          |
|                            |        |          |
| $\text{HPbCN}^{11}$        | 0.00   | 0.014245 |
| $\text{HPbNC}^{12}$        | 5.89   | 0.015083 |
| $\text{PbNCH}^{13}$        | 32.55  | 0.015305 |
| $\text{HCPbN}^{14}$        | 149.65 | 0.049274 |
| $\text{HNCpPb}^{15}$       | 29.86  | 0.022209 |
| $\text{HNpPbC}^{16}$       | 151.76 | 0.042286 |
| $c\text{-PbCHN}^{17}$      | 14.78  | 0.013927 |
| $c\text{-PbCHN}^{18}$      | 37.30  | 0.019809 |
| $\text{CHPbN}^{19}$        | 44.90  | 0.019238 |
| $\text{CHPbN}^{110}$       | 58.30  | 0.020286 |
| $\text{PbNHC}^{111}$       | 33.34  | 0.019075 |
| $^1\text{Pb}+\text{HNC}$   | 58.30  |          |
| $^1\text{Pb}+\text{HCN}$   | 44.01  |          |
| $^1\text{ts}1/2$           | 9.63   | 0.015209 |
| $^1\text{ts}1/5$           | 65.43  | 0.028527 |
| $^1\text{ts}1/7$           | 44.03  | 0.013475 |
| $^1\text{ts}2/11$          | 29.65  | 0.015507 |
| $^1\text{ts}2/9$           | 42.23  | 0.016548 |
| $^1\text{ts}3/10$          | 75.38  | 0.021055 |
| $^1\text{ts}3/7$           | 37.76  | 0.012472 |
| $^1\text{ts}4/6$           | 203.56 | 0.112200 |
| $^1\text{ts}4/7$           | 159.70 | 0.090438 |
| $^1\text{ts}5/8$           | 49.67  | 0.037089 |
| $^1\text{ts}6/8$           | 159.95 | 0.056816 |
| $^1\text{ts}7/11$          | 34.06  | 0.020461 |
| $^1\text{ts}7/8$           | 73.22  | 0.024633 |
| $^1\text{ts}8/10$          | 57.52  | 0.016991 |
| $^1\text{ts}8/9$           | 48.60  | 0.017335 |
| $\text{HPbCN}^{31}$        | 47.29  | 0.019888 |
| $\text{HPbNC}^{32}$        | 58.25  | 0.018580 |
| $\text{PbNCH}^{33}$        | 14.39  | 0.016882 |
| $\text{NPbCH}^{34}$        | 147.84 | 0.057635 |
| $\text{PbCNH}^{35}$        | 20.50  | 0.016727 |
| $\text{CPbNH}^{36}$        | 139.91 | 0.068879 |

|                                   |        |          |
|-----------------------------------|--------|----------|
| <i>c</i> -PbHNC <sup>3</sup> 7    | 61.22  | 0.018547 |
| CPb(H)N <sup>3</sup> 8            | 210.97 | 0.059222 |
| <sup>3</sup> ts1/3                | 55.92  | 0.021741 |
| <sup>3</sup> ts1/5                | 53.35  | 0.023508 |
| <sup>3</sup> ts1/7                | 61.50  | 0.019765 |
| <sup>3</sup> ts1/8                | 209.49 | 0.062674 |
| <sup>3</sup> ts2/7                | 61.49  | 0.018011 |
| <sup>3</sup> ts3/5                | 66.64  | 0.017658 |
| <sup>3</sup> ts4/8                | 210.30 | 0.062718 |
| <sup>3</sup> ts6/8                | 220.54 | 0.035097 |
| <sup>3</sup> ts7/8                | 206.23 | 0.127857 |
| <sup>3</sup> Pb+HCN               | 25.36  |          |
| <sup>3</sup> Pb+HNC               | 39.63  |          |
| <sup>2</sup> CH+ <sup>2</sup> PbN | 190.76 |          |
| <sup>3</sup> NH+ <sup>3</sup> PbC | 178.53 |          |
| <sup>2</sup> H+ <sup>2</sup> CPbN | 243.57 |          |
| HPb+CN                            | 93.96  |          |
| <sup>2</sup> H+ <sup>2</sup> PbCN | 58.60  |          |
| <sup>2</sup> H+ <sup>2</sup> PbNC | 64.99  |          |

## 6.

Table S5 Harmonic vibrational frequencies ( $\text{cm}^{-1}$ ), infrared intensities ( $\text{km/mol}$ ) (in parentheses), dipole moment (Debye), and rotational constants (GHZ) of doublet/doublet [Sn,C,N] and [Pb,C,N] at the B3LYP/def2-qzvpp level.

| Species                       | Frequencies (infrared intensity)     | Dipole moments (Debye) | Rotational constants (GHZ) |           |           |
|-------------------------------|--------------------------------------|------------------------|----------------------------|-----------|-----------|
| SnCN <sup>2</sup> 1           | 159(3), 219(0), 370(65), 2210(19)    | 4.7742                 | 2.87844                    |           |           |
| SnNC <sup>2</sup> 2           | 140(0), 401(92), 2090(328)           | 4.7679                 | 3.23304                    |           |           |
| CSnN <sup>2</sup> 3           | 104(12), 523(71), 793(14)            | 2.0840                 | 4.99979                    |           |           |
| SnCN <sup>4</sup> 1           | 273(0), 273(0), 375(0), 2140(14)     | 3.7183                 | 3.04861                    |           |           |
| SnNC <sup>4</sup> 2           | 212(10), 212(10), 247(37), 2030(195) | 0.0314                 | 3.08090                    |           |           |
| CSnN <sup>4</sup> 3           | 172(27), 172(27), 491(5), 718(7)     | 1.6623                 | 5.07940                    |           |           |
| <i>c</i> -SnCN <sup>4</sup> 4 | 136(43), 200(16), 1921(107)          | 1.2570                 | 55.8282357                 | 4.1594252 | 3.8710189 |
| PbCN <sup>2</sup> 1           | 150(1), 323(66), 2214(21)            | 5.6974                 | 2.4846333                  |           |           |
| PbNC <sup>2</sup> 2           | 45(0), 110(0), 343(90), 2100(345)    | 5.9103                 | 2.7550782                  |           |           |
| CPbN <sup>2</sup> 3           | 115(12), 487(63), 727(4)             | 2.0090                 | 4.7709116                  |           |           |
| PbCN <sup>4</sup> 1           | 234(0), 234(0), 236(6), 2060(44)     | 2.7677                 | 2.5200082                  |           |           |
| PbNC <sup>4</sup> 2           | 179(4), 183(16), 193(16), 2047(682)  | 1.5485                 | 2.3803909                  |           |           |
| CPbN <sup>4</sup> 3           | 43(19), 58(11), 450(12), 2060(44)    | 0.3162                 | 4.3541923                  |           |           |
| <i>c</i> -PbCN <sup>4</sup> 4 | 109(3), 179(23), 2008(170)           | 1.0635                 | 57.5444298                 | 2.7430372 | 2.6182309 |

Table S6 Harmonic vibrational frequencies ( $\text{cm}^{-1}$ ), infrared intensities ( $\text{km/mol}$ ) (in parentheses), dipole moment (Debye), and rotational constants (GHZ) of singlet/triplet [H,Sn,C,N] and [H,Pb,C,N] at the B3LYP/def2-qzvpp level.

| Species                        | Frequencies (infrared intensity)                            | Dipole moments (Debye) | Rotational constants (GHZ) |           |           |
|--------------------------------|-------------------------------------------------------------|------------------------|----------------------------|-----------|-----------|
| HSnCN <sup>1</sup> 1           | 164(4), 203(3), 3737(69), 626(55), 1746(361), 2246(39)      | 4.7842                 | 158.4060773                | 2.8550646 | 2.8045168 |
| HSnNC <sup>1</sup> 2           | 94(2), 131(1), 410(98), 629(50), 1735(414), 2117(373)       | 4.8126                 | 152.0822952                | 3.2327890 | 3.1655005 |
| SnNCH <sup>1</sup> 3           | 170(2), 285(40), 351(110),767(1120), 1802(611), 3031(33)    | 1.0547                 | 865.2329686                | 3.0541690 | 3.0434260 |
| NSnCH <sup>1</sup> 4           | 122(11), 143(7), 528(22), 793(5), 808(40), 2976(16)         | 3.3513                 | 241.8777821                | 4.8760432 | 4.7796889 |
| SnCNH <sup>1</sup> 5           | 206(1), 286(41), 390(1), 905(526), 1823(531), 3360(16)      | 1.1647                 | 763.8556690                | 2.7858281 | 2.7757050 |
| CSnNH <sup>1</sup> 6           | 92(12), 293(115), 464(115),546(29), 796(37), 3592(82)       | 2.0901                 | 120.3884692                | 4.8403120 | 4.6532254 |
| <i>c</i> -SnCHN <sup>1</sup> 7 | 405(15), 552(50), 758(30), 1064(131), 1600(93), 2998(59)    | 2.3879                 | 42.1832507                 | 5.1225551 | 4.5678543 |
| <i>c</i> -SnCNH <sup>1</sup> 8 | 359(1), 497(48), 641(65), 1060(64), 1503(124), 3361(5)      | 2.5539                 | 42.5527581                 | 4.8671160 | 4.3675614 |
| HCNSn <sup>3</sup> 1           | 204(2), 251(0), 400(31), 496(18), 1719(31), 2220(4)         | 4.3600                 | 211.1244519                | 2.9859452 | 2.9443037 |
| HNCSn <sup>3</sup> 2           | 124(0), 164(0), 427(46), 465(11), 1625(15), 2100(234)       | 4.3352                 | 193.9186054                | 3.2975964 | 3.2424583 |
| SnNCH <sup>3</sup> 3           | 189(30), 201(6), 598(19), 602(26), 2067(571), 3435(513)     | 3.9622                 | 291333.4488043             | 2.6074545 | 2.6074311 |
| NSnCH <sup>3</sup> 4           | 104(5), 306(15), 577(59), 613(82), 675(41), 3159(2)         | 2.8155                 | 70.2637648                 | 5.1124139 | 4.7656628 |
| SnCNH <sup>3</sup> 5           | 230(49), 243(12), 279(207), 397(350), 1943(1001), 3681(338) | 2.4091                 | 2122.9149338               | 2.6465634 | 2.6432681 |
| CSnNH <sup>3</sup> 6           | 82(9), 211(56), 483(1), 578(120), 773(11), 3515(37)         | 2.3900                 | 96.6928520                 | 4.8559605 | 4.6237535 |
| <i>c</i> -SnCHN <sup>3</sup> 7 | 189(12), 196(29), 455(90), 695(184), 1753(305), 3052(59)    | 1.8627                 | 46.2546401                 | 3.8522885 | 3.5561194 |
| <i>c</i> -NHSnC <sup>3</sup> 8 | 147(9), 209(1), 376(36), 438(10), 1591(14), 1945(7)         | 3.3425                 | 44.0065826                 | 4.6542780 | 4.3940424 |
| NSnCH <sup>3</sup> 9           | 77(11), 173(17), 363(16), 521(38), 534(25), 1816(127)       | 2.1078                 | 19.6859487                 | 5.8964081 | 4.5615705 |
| HPbCN <sup>1</sup> 1           | 150(2),183(3), 329(67), 562(42), 1629(445), 2242(38)        | 5.7488                 | 145.7645480                | 2.4689069 | 2.4277859 |
| HPbNC <sup>1</sup> 2           | 62(2), 103(2), 358(90), 554(39), 1616(486),2118(367)        | 5.9723                 | 139.0559261                | 2.7667664 | 2.7127906 |
| PbNCH <sup>1</sup> 3           | 148(22), 204(4), 254(33), 801(23), 2075(644), 3438(536)     | 3.2505                 | 551891.37741               | 0.10698   | 0.10698   |

|                               |                                                                   |        |                 |           |           |
|-------------------------------|-------------------------------------------------------------------|--------|-----------------|-----------|-----------|
| HCPbN <sup>14</sup>           | 132(10), 145(4), 489(22), 734(4), 865(24), 2943(27)               | 3.1987 | 294.0896744     | 4.5825580 | 4.5122473 |
| HNCpb <sup>15</sup>           | 190(4), 259(46), 326(3), 843(625), 1836(669), 3380(19)            | 1.2179 | 804.2800496     | 2.3828401 | 2.3758013 |
| HNPbC <sup>16</sup>           | 101(6), 130(6), 533(24), 650(16), 909(37), 3397(17)               | 1.6083 | 303.1188083     | 4.4845332 | 4.4191534 |
| <i>c</i> -PbCHN <sup>17</sup> | 170(2), 221(0), 335(37), 393(5), 1341(7), 2214(12)                | 4.9044 | 190.1130301     | 2.5635217 | 2.5294146 |
| <i>c</i> -PbCHN <sup>18</sup> | 295(1), 437(54), 599(72), 983(99), 1571 (196), 3383(11)           | 2.6518 | 43.5624126      | 3.9126136 | 3.5901589 |
| CHPbN <sup>19</sup>           | 229(7), 444(21), 655(4), 775(660), 1749(259), 2158(219)           | 3.7619 | 45.00220        | 3.49389   | 3.24217   |
| CHPbN <sup>110</sup>          | 87(18), 107(1), 189(46), 823(273), 1918(57), 250(1890)            | 3.4663 | 365.7808763     | 2.1152633 | 2.1031014 |
| PbNHC <sup>111</sup>          | 175(181), 431(181), 516(705), 775(6), 1832(330), 2598(96)         | 3.3060 | 43.2963678      | 3.5211683 | 3.2563397 |
| HPbCN <sup>31</sup>           | 170(2), 221(0), 335(37), 393(5), 1341(7), 2214(12)                | 4.9044 | 190.1130301     | 2.5635217 | 2.5294146 |
| HPbNC <sup>32</sup>           | 89(0), 130(0), 328(20), 334(12), 1103(27), 2093(133)              | 5.0574 | 164.8698876     | 2.7692292 | 2.7234843 |
| PbNCH <sup>33</sup>           | 161(31), 171(2), 671(22), 673(26), 2125(354), 3436(425)           | 3.8916 | 1427740.8915008 | 2.1315915 | 2.1315883 |
| NPbCH <sup>34</sup>           | 105(7), 259(21), 517(37), 533(74), 696(98), 3093 (10)             | 2.5682 | 83.5155922      | 4.6597915 | 4.4135362 |
| PbCNH <sup>35</sup>           | 149(130), 149(130), 208(5), 208(5), 236(3), 2024(1035), 3822(934) | 3.1624 | 0.0000000       | 2.1722489 | 2.1722489 |
| CPbNH <sup>36</sup>           | 71(11), 173(47), 431(3), 628(88), 729(19), 3446(20)               | 2.2669 | 115.2486825     | 4.4170551 | 4.2540145 |
| <i>c</i> -PbHNC <sup>37</sup> | 103(8), 156(1), 297(2), 320(39), 1058(16), 197(9)                 | 4.2260 | 42.5414493      | 3.8068986 | 3.6386664 |
| CPb(H)N <sup>38</sup>         | 76(14), 209(5), 258(9), 477(95), 510(2), 1702(134)                | 1.6524 | 25.9536307      | 5.0991843 | 4.2618470 |

7.

Table S7 Selected standard bond distances ( $r$ ) (in Å) of reference molecules.

| X  | $r(\text{X-C})$           | $r(\text{X=C})$           | $r(\text{X-N})$           | $r(\text{X=N})$         |
|----|---------------------------|---------------------------|---------------------------|-------------------------|
|    | $\text{XH}_3\text{-CH}_3$ | $\text{XH}_2\text{=CH}_2$ | $\text{XH}_3\text{-NH}_2$ | $\text{XH}_2\text{=NH}$ |
| C  | 1.527                     | 1.324                     | 1.436                     | 1.263                   |
| Si | 1.877                     | 1.701                     | 1.738                     | 1.593                   |
| Ge | 1.965                     | 1.775                     | 1.853                     | 1.710                   |
| Sn | 2.159                     | 1.960                     | 2.049                     | 1.909                   |
| Pb | 2.242                     | 2.017                     | 2.161                     | 1.997                   |

8.

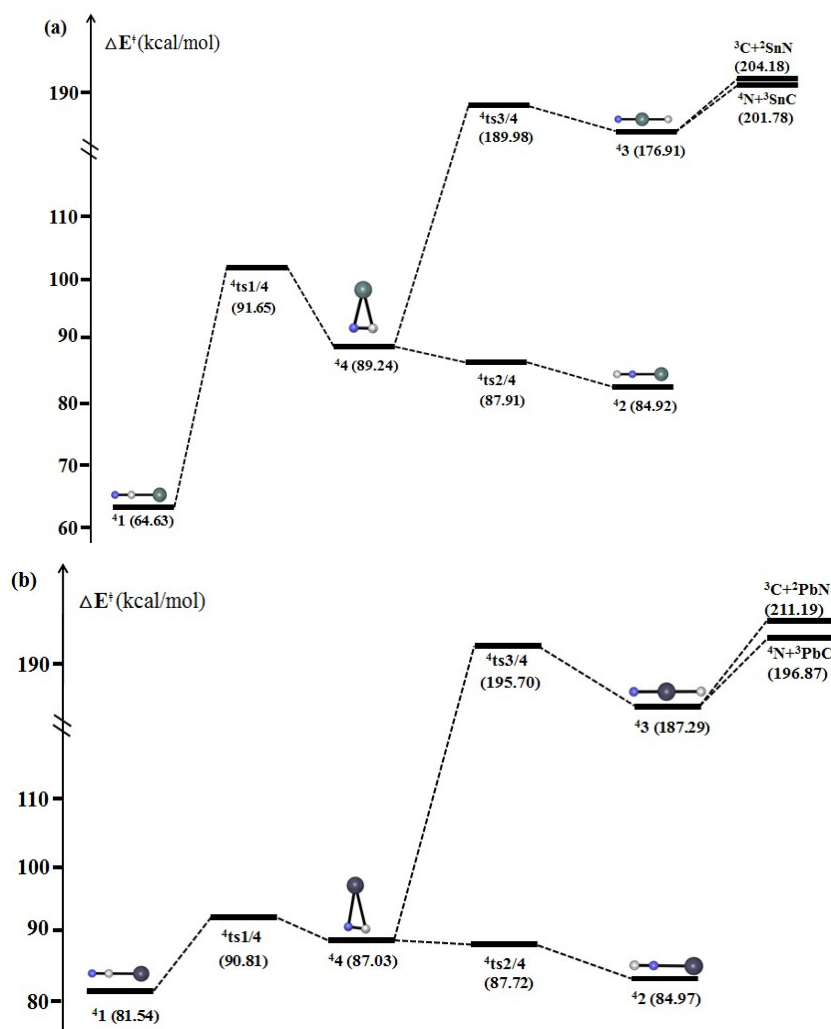Fig. S5 Schematic potential energy surfaces of quartet  $[\text{X,C,N}]$  ( $\text{X}=\text{Sn}, \text{Pb}$ ) at the level of CCSD(T)/def2-QZVPP//B3LYP/def2-QZVPP+ZPVE in the parentheses.



9. Table S8 Cartesian coordinates of doublet/doublet [X,C,N] and singlet/triplet [H,X,C,N] (X=Sn, Pb) structures and transition states at the B3LYP/def2-QZVP level of theory.

CNSn\_doublet\_1-B3LYP-def2-qzvpp

|    |          |          |           |
|----|----------|----------|-----------|
| N  | 0.000000 | 0.000000 | -2.756016 |
| C  | 0.000000 | 0.000000 | -1.597546 |
| Sn | 0.000000 | 0.000000 | 0.577548  |

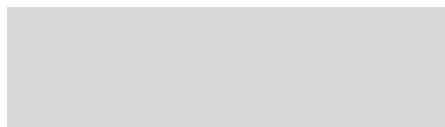

CNSn\_doublet\_2-B3LYP-def2-qzvpp

|    |           |           |          |
|----|-----------|-----------|----------|
| C  | 0.000618  | -2.720656 | 0.000000 |
| N  | -0.000529 | -1.544804 | 0.000000 |
| Sn | 0.000000  | 0.542751  | 0.000000 |

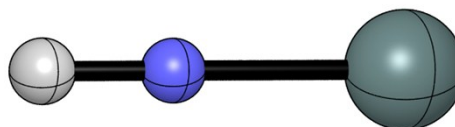

CNSn\_doublet\_3-B3LYP-def2-qzvpp

|    |           |           |          |
|----|-----------|-----------|----------|
| C  | 0.092172  | 2.098703  | 0.000000 |
| Sn | 0.000000  | 0.007437  | 0.000000 |
| N  | -0.079005 | -1.852010 | 0.000000 |

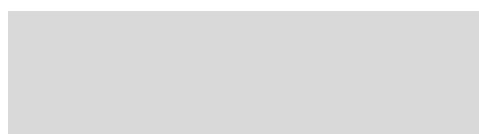

CNSn\_doublet\_ts1-B3LYP-def2-qzvpp

|    |           |           |          |
|----|-----------|-----------|----------|
| C  | 0.588042  | -1.686478 | 0.000000 |
| N  | -0.504036 | -2.109737 | 0.000000 |
| Sn | 0.000000  | 0.497741  | 0.000000 |

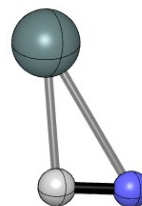

CNSn\_doublet\_ts2-B3LYP-def2-qzvpp

|    |           |           |          |
|----|-----------|-----------|----------|
| C  | 0.630082  | -1.873185 | 0.000000 |
| N  | -0.540071 | -1.807291 | 0.000000 |
| Sn | 0.000000  | 0.477803  | 0.000000 |

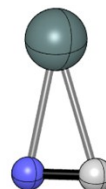

CNSn\_doublet\_ts3-B3LYP-def2-qzvpp

|    |           |           |          |
|----|-----------|-----------|----------|
| C  | 1.556792  | -1.190815 | 0.000000 |
| N  | -1.334393 | -1.084525 | 0.000000 |
| Sn | 0.000000  | 0.294731  | 0.000000 |

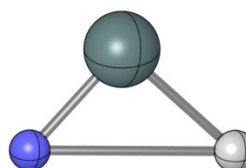

CNSn\_quartet\_1-B3LYP-def2-qzvpp

|    |          |          |           |
|----|----------|----------|-----------|
| N  | 0.000000 | 0.000000 | -2.691129 |
| C  | 0.000000 | 0.000000 | -1.528984 |
| Sn | 0.000000 | 0.000000 | 0.560236  |

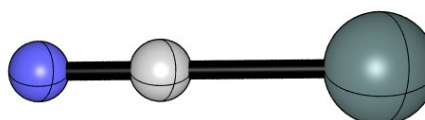

CNSn\_quartet\_2-B3LYP-def2-qzvpp

|    |          |          |           |
|----|----------|----------|-----------|
| C  | 0.000000 | 0.000000 | -2.772487 |
| N  | 0.000000 | 0.000000 | -1.601565 |
| Sn | 0.000000 | 0.000000 | 0.556918  |

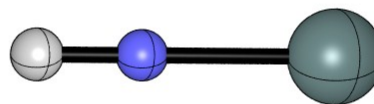

CNSn\_quartet\_3-B3LYP-def2-qzvpp

|    |          |          |           |
|----|----------|----------|-----------|
| C  | 0.000000 | 0.000000 | 2.062037  |
| Sn | 0.000000 | 0.000000 | 0.012975  |
| N  | 0.000000 | 0.000000 | -1.860140 |

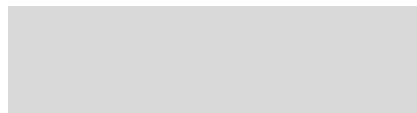

CNSn\_quartet\_4-B3LYP-def2-qzvpp

|    |           |           |          |
|----|-----------|-----------|----------|
| C  | 0.637304  | -1.892375 | 0.000000 |
| N  | -0.546261 | -1.897874 | 0.000000 |
| Sn | 0.000000  | 0.492787  | 0.000000 |

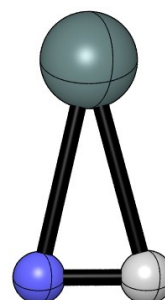

CNSn\_quartet\_ts1-B3LYP-def2-qzvpp

|    |           |           |          |
|----|-----------|-----------|----------|
| C  | 0.559448  | -2.378560 | 0.000000 |
| N  | -0.479527 | -1.838474 | 0.000000 |
| Sn | 0.000000  | 0.542814  | 0.000000 |

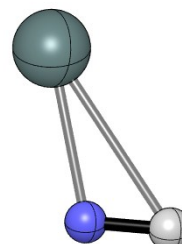

CNSn\_quartet\_ts2-B3LYP-def2-qzvpp

|    |           |           |          |
|----|-----------|-----------|----------|
| C  | 0.591310  | -1.751184 | 0.000000 |
| N  | -0.506837 | -2.163287 | 0.000000 |
| Sn | 0.000000  | 0.513002  | 0.000000 |

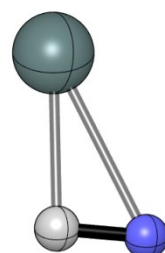

CNSn\_quartet\_ts3-B3LYP-def2-qzvpp

|    |           |           |          |
|----|-----------|-----------|----------|
| C  | 1.600614  | -1.031663 | 0.000000 |
| N  | -1.371955 | -1.291029 | 0.000000 |
| Sn | 0.000000  | 0.304544  | 0.000000 |

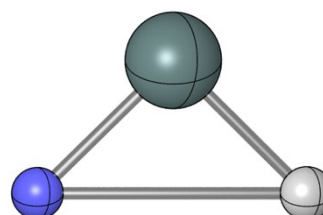

HCNSn\_singlet\_1-B3LYP-def2-qzvpp

|    |           |           |          |
|----|-----------|-----------|----------|
| N  | -0.207592 | -2.764053 | 0.000000 |
| H  | 1.773459  | 0.541982  | 0.000000 |
| C  | -0.053385 | -1.618378 | 0.000000 |
| Sn | 0.000000  | 0.570333  | 0.000000 |

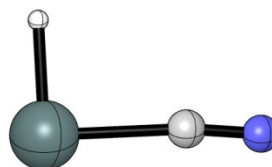

HCNSn\_singlet\_2-B3LYP-def2-qzvpp

|    |           |           |          |
|----|-----------|-----------|----------|
| H  | 1.777635  | 0.559912  | 0.000000 |
| Sn | 0.000000  | 0.532876  | 0.000000 |
| C  | -0.266645 | -2.711190 | 0.000000 |
| N  | -0.025395 | -1.562369 | 0.000000 |

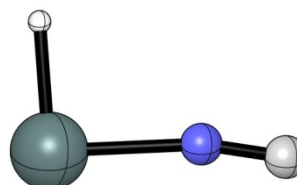

HCNSn\_singlet\_3-B3LYP-def2-qzvpp

|    |           |           |          |
|----|-----------|-----------|----------|
| C  | -0.103730 | -2.651206 | 0.000000 |
| H  | 0.679856  | -3.412676 | 0.000000 |
| N  | -0.008211 | -1.455348 | 0.000000 |
| Sn | 0.000000  | 0.590147  | 0.000000 |

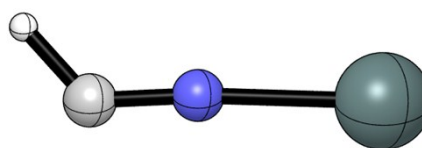

HCNSn\_singlet\_4-B3LYP-def2-qzvpp

|    |           |           |          |
|----|-----------|-----------|----------|
| C  | 1.548113  | -1.299297 | 0.000000 |
| Sn | 0.000000  | 0.051243  | 0.000000 |
| H  | 2.485746  | -0.713610 | 0.000000 |
| N  | -1.682061 | 0.849605  | 0.000000 |

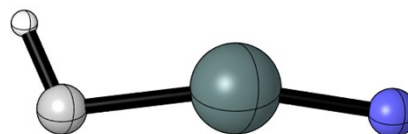

HCNSn\_singlet\_5-B3LYP-def2-qzvpp

|    |           |           |          |
|----|-----------|-----------|----------|
| H  | 0.719009  | -3.286575 | 0.000000 |
| N  | -0.106295 | -2.682846 | 0.000000 |
| Sn | 0.000000  | 0.618218  | 0.000000 |
| C  | 0.004176  | -1.474070 | 0.000000 |

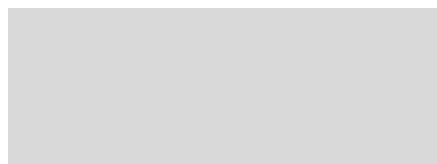

HCNSn\_singlet\_6-B3LYP-def2-qzvpp

|    |           |           |          |
|----|-----------|-----------|----------|
| H  | -2.410340 | -1.071490 | 0.000000 |
| N  | -1.401380 | -1.131560 | 0.000000 |
| Sn | 0.000000  | 0.100063  | 0.000000 |
| C  | 2.036666  | 0.664879  | 0.000000 |

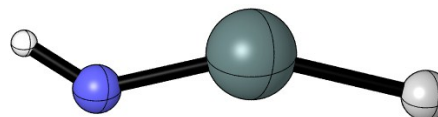

HCNSn\_singlet\_7-B3LYP-def2-qzvpp

|    |           |           |          |
|----|-----------|-----------|----------|
| H  | 1.279053  | -2.436269 | 0.000000 |
| C  | 0.575132  | -1.597957 | 0.000000 |
| N  | -0.675692 | -1.625329 | 0.000000 |
| Sn | 0.000000  | 0.468026  | 0.000000 |

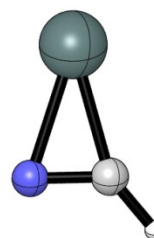

HCNSn\_singlet\_8-B3LYP-def2-qzvpp

|    |           |           |          |
|----|-----------|-----------|----------|
| H  | -1.187993 | -2.349775 | 0.000000 |
| N  | -0.491349 | -1.604745 | 0.000000 |
| C  | 0.771239  | -1.729642 | 0.000000 |
| Sn | 0.000000  | 0.479217  | 0.000000 |

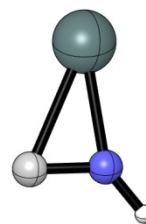

HCNSn\_singlet\_1\_HCNSn\_singlet\_2-B3LYP-def2-qzvpp

|    |           |           |           |
|----|-----------|-----------|-----------|
| H  | -0.562877 | 0.312820  | 1.711716  |
| C  | 1.872139  | 0.618860  | -0.071718 |
| N  | 1.815692  | -0.541700 | 0.073197  |
| Sn | -0.467596 | -0.004682 | -0.035876 |

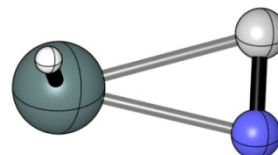

HCNSn\_singlet\_1\_HCNSn\_singlet\_5-B3LYP-def2-qzvpp

|    |           |           |           |
|----|-----------|-----------|-----------|
| Sn | -0.617796 | 0.000854  | -0.000001 |
| H  | 1.942136  | 1.020587  | 0.000024  |
| N  | 2.783648  | -0.033018 | 0.000006  |
| C  | 1.577019  | -0.138696 | 0.000001  |

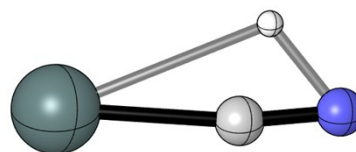

HCNSn\_singlet\_1\_HCNSn\_singlet\_7-B3LYP-def2-qzvpp

|    |           |           |           |
|----|-----------|-----------|-----------|
| H  | -1.406114 | 1.116632  | 0.000010  |
| C  | -2.151673 | 0.305183  | 0.000003  |
| N  | -3.141279 | -0.282598 | -0.000002 |
| Sn | 0.726102  | -0.019391 | 0.000000  |

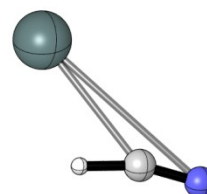

HCNSn\_singlet\_1\_HCNSn\_singlet\_8-B3LYP-def2-qzvpp

|    |           |           |           |
|----|-----------|-----------|-----------|
| H  | -1.748380 | 1.441401  | 0.000003  |
| C  | -1.833448 | -0.763815 | -0.000001 |
| N  | -1.902668 | 0.443195  | 0.000001  |
| Sn | 0.521355  | 0.000782  | 0.000000  |

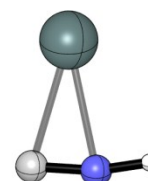

HCNSn\_singlet\_2\_HCNSn\_singlet\_3-B3LYP-def2-qzvpp

|    |           |           |           |
|----|-----------|-----------|-----------|
| H  | -2.192750 | 1.022629  | 0.000287  |
| C  | -2.856460 | -0.133869 | 0.000128  |
| N  | -1.641550 | -0.005269 | 0.000077  |
| Sn | 0.616447  | -0.003651 | -0.000032 |

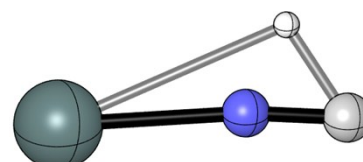

HCNSn\_singlet\_2\_HCNSn\_singlet\_7-B3LYP-def2-qzvpp\*

|    |           |           |           |
|----|-----------|-----------|-----------|
| H  | 2.177984  | 0.754107  | 0.842813  |
| C  | 1.861240  | 0.426311  | -0.167311 |
| N  | -0.799752 | 1.532326  | -0.012795 |
| Sn | -0.154943 | -0.280765 | 0.005012  |

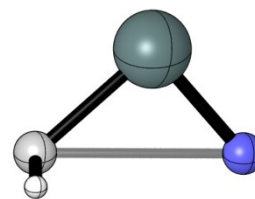

HCNSn\_singlet\_2\_HCNSn\_singlet\_7-B3LYP-def2-qzvpp

|    |           |           |          |
|----|-----------|-----------|----------|
| H  | 1.566438  | -1.629341 | 0.000000 |
| C  | 0.516761  | -1.921844 | 0.000000 |
| N  | -0.666715 | -1.704067 | 0.000000 |
| Sn | 0.000000  | 0.501777  | 0.000000 |

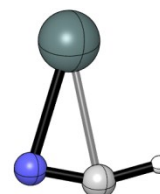

HCNSn\_singlet\_2\_HCNSn\_singlet\_8-B3LYP-def2-qzvpp

|    |           |           |           |
|----|-----------|-----------|-----------|
| H  | 1.446218  | 1.054610  | 0.000053  |
| C  | 3.122603  | -0.254001 | 0.000012  |
| N  | 2.030327  | 0.186917  | -0.000016 |
| Sn | -0.687883 | -0.016780 | 0.000000  |

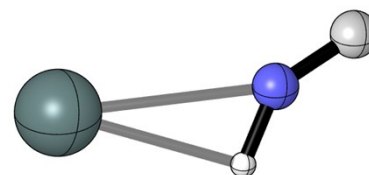

HCNSn\_singlet\_3\_HCNSn\_singlet\_7-B3LYP-def2-qzvpp

|    |           |           |           |
|----|-----------|-----------|-----------|
| H  | 3.037883  | -0.717828 | 0.500849  |
| C  | 2.214415  | -0.361045 | -0.126615 |
| N  | 1.497941  | 0.598649  | 0.021037  |
| Sn | -0.536199 | -0.026129 | 0.002232  |

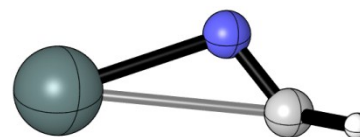

HCNSn\_singlet\_4\_HCNSn\_singlet\_6-B3LYP-def2-qzvpp

|    |           |           |           |
|----|-----------|-----------|-----------|
| N  | 1.880609  | -0.278411 | 0.000572  |
| Sn | -0.020323 | 0.032101  | -0.000187 |
| C  | -2.109435 | -0.224275 | 0.000665  |
| H  | 0.508513  | 1.689493  | 0.001367  |

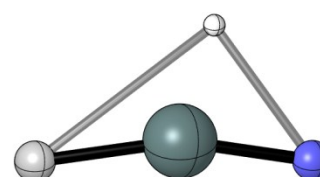

HCNSn\_singlet\_4\_HCNSn\_singlet\_7-B3LYP-def2-qzvpp

|    |           |           |          |
|----|-----------|-----------|----------|
| H  | 2.354125  | -1.687966 | 0.000000 |
| C  | 1.406553  | -1.141230 | 0.000000 |
| N  | -1.541920 | -1.043353 | 0.000000 |
| Sn | 0.000000  | 0.316776  | 0.000000 |

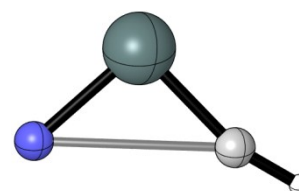

HCNSn\_singlet\_5\_HCNSn\_singlet\_8-B3LYP-def2-qzvpp

|   |          |           |          |
|---|----------|-----------|----------|
| H | 2.782444 | -0.706095 | 0.498074 |
| C | 1.544915 | 0.746682  | 0.015980 |

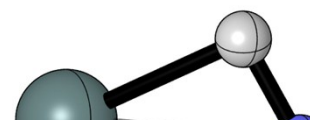

|    |           |           |           |
|----|-----------|-----------|-----------|
| N  | 2.018050  | -0.389664 | -0.103700 |
| Sn | -0.523566 | -0.020927 | 0.002639  |

HCNSn\_singlet\_6\_HCNSn\_singlet\_8-B3LYP-def2-qzvpp

|    |           |           |           |
|----|-----------|-----------|-----------|
| H  | 1.838838  | 1.222396  | 0.671078  |
| C  | -1.209049 | 1.507089  | -0.024536 |
| N  | 1.637830  | 0.604558  | -0.119835 |
| Sn | -0.120987 | -0.289937 | 0.006300  |

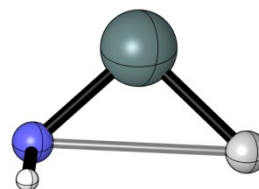

HCNSn\_singlet\_7\_HCNSn\_singlet\_8-B3LYP-def2-qzvpp

|    |           |           |          |
|----|-----------|-----------|----------|
| H  | -0.039416 | -2.740525 | 0.000000 |
| C  | 0.693704  | -1.692190 | 0.000000 |
| N  | -0.588972 | -1.680125 | 0.000000 |
| Sn | 0.000000  | 0.493091  | 0.000000 |

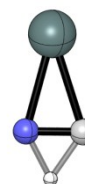

HCNSn\_triplet\_1-B3LYP-def2-qzvpp

|    |           |           |          |
|----|-----------|-----------|----------|
| H  | 1.583789  | 1.237021  | 0.000000 |
| Sn | 0.000000  | 0.543530  | 0.000000 |
| C  | -0.065371 | -1.565326 | 0.000000 |
| N  | -0.170223 | -2.717369 | 0.000000 |

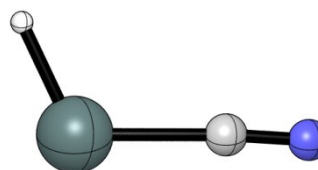

HCNSn\_triplet\_2-B3LYP-def2-qzvpp

|    |           |           |          |
|----|-----------|-----------|----------|
| H  | 1.634337  | 1.130639  | 0.000000 |
| Sn | 0.000000  | 0.516090  | 0.000000 |
| N  | -0.046595 | -1.535518 | 0.000000 |
| C  | -0.218028 | -2.697752 | 0.000000 |

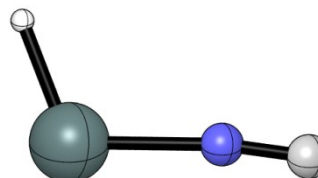

HCNSn\_triplet\_3-B3LYP-def2-qzvpp

|    |           |           |           |
|----|-----------|-----------|-----------|
| H  | -3.861355 | 0.021255  | 0.000175  |
| C  | -2.796744 | 0.002555  | -0.000070 |
| N  | -1.643452 | -0.009276 | 0.000040  |
| Sn | 0.642920  | 0.000567  | -0.000001 |

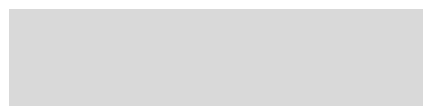

HCNSn\_triplet\_4-B3LYP-def2-qzvpp

|    |           |           |          |
|----|-----------|-----------|----------|
| H  | 2.790939  | -0.372754 | 0.000000 |
| C  | 1.773175  | -0.752686 | 0.000000 |
| Sn | 0.000000  | 0.120494  | 0.000000 |
| N  | -1.918570 | -0.162260 | 0.000000 |

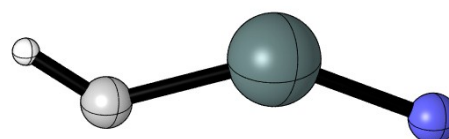

HCNSn\_triplet\_5-B3LYP-def2-qzvpp

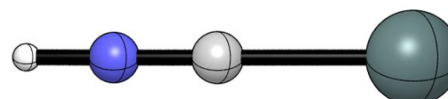

|    |           |           |          |
|----|-----------|-----------|----------|
| Sn | 0.000000  | 0.649549  | 0.000000 |
| C  | -0.000781 | -1.573112 | 0.000000 |
| H  | 0.004367  | -3.757076 | 0.000000 |
| N  | 0.000045  | -2.754529 | 0.000000 |

HCNSn\_triplet\_6-B3LYP-def2-qzvpp

|    |           |           |          |
|----|-----------|-----------|----------|
| H  | -2.405577 | -0.805048 | 0.000000 |
| N  | -1.436611 | -1.113445 | 0.000000 |
| Sn | 0.000000  | 0.106885  | 0.000000 |
| C  | 2.076976  | 0.542486  | 0.000000 |

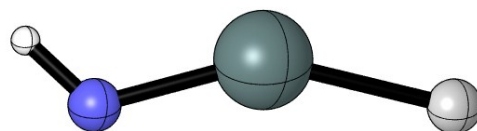

HCNSn\_triplet\_7-B3LYP-def2-qzvpp

|    |           |           |          |
|----|-----------|-----------|----------|
| H  | -1.135410 | -2.680986 | 0.000000 |
| N  | -0.470463 | -1.916708 | 0.000000 |
| C  | 0.738108  | -1.809289 | 0.000000 |
| Sn | 0.000000  | 0.539073  | 0.000000 |

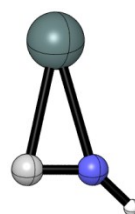

HCNSn\_triplet\_8-B3LYP-def2-qzvpp

|    |           |           |           |
|----|-----------|-----------|-----------|
| C  | -1.880883 | -0.598669 | 0.091737  |
| N  | -1.686306 | 0.571494  | -0.007895 |
| Sn | 0.437774  | -0.012590 | -0.040281 |
| H  | 1.200736  | 0.221047  | 1.518891  |

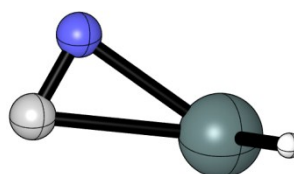

HCNSn\_triplet\_9-B3LYP-qzvpp-1

|    |           |           |           |
|----|-----------|-----------|-----------|
| H  | 0.217825  | -1.821137 | 0.435630  |
| C  | -1.859863 | 0.875727  | 0.062636  |
| N  | 1.767469  | 0.801013  | 0.046200  |
| Sn | -0.028619 | -0.180806 | -0.022697 |

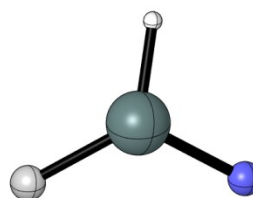

HCNSn\_triplet\_1\_HCNSn\_triplet\_3-B3LYP-def2-qzvpp

|    |           |           |           |
|----|-----------|-----------|-----------|
| Sn | -0.590478 | -0.017326 | -0.000021 |
| C  | 1.607001  | -0.115930 | 0.000059  |
| N  | 2.770582  | -0.009741 | 0.000099  |
| H  | 0.487829  | 1.630066  | -0.000004 |

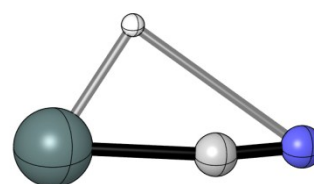

HCNSn\_triplet\_1\_HCNSn\_triplet\_8-B3LYP-def2-qzvpp

|    |           |           |           |
|----|-----------|-----------|-----------|
| H  | 1.090942  | 1.290991  | 0.927605  |
| Sn | 0.453030  | -0.025541 | -0.026113 |
| C  | -1.696578 | -0.592621 | 0.215753  |
| N  | -1.937570 | 0.505967  | -0.130928 |

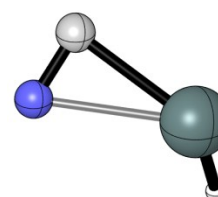

HCNSn\_triplet\_2\_HCNSn\_triplet\_3-B3LYP-def2-qzvpp

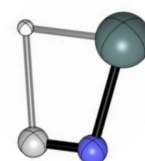

|    |           |           |           |
|----|-----------|-----------|-----------|
| H  | -0.320080 | 1.734354  | 0.000027  |
| C  | -2.146433 | 0.470337  | -0.000002 |
| N  | -1.648009 | -0.591138 | -0.000021 |
| Sn | 0.494695  | -0.008368 | 0.000003  |

HCNSn\_triplet\_2\_HCNSn\_triplet\_7-B3LYP-def2-qzvpp

|    |           |           |           |
|----|-----------|-----------|-----------|
| H  | -0.813172 | 1.391791  | 0.000002  |
| C  | -2.811268 | -0.037840 | 0.000011  |
| N  | -1.626245 | -0.075751 | 0.000006  |
| Sn | 0.581290  | -0.012690 | -0.000002 |

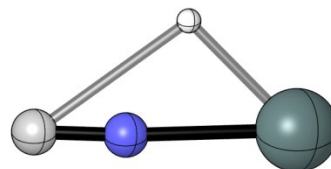

HCNSn\_triplet\_2\_HCNSn\_triplet\_8-B3LYP-def2-qzvpp

|    |           |           |           |
|----|-----------|-----------|-----------|
| H  | 1.204904  | 0.163173  | 1.532270  |
| Sn | 0.451925  | -0.018637 | -0.039587 |
| C  | -2.080366 | -0.527835 | 0.082299  |
| N  | -1.616997 | 0.562243  | -0.006675 |

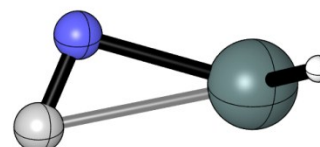

HCNSn\_triplet\_3\_HCNSn\_triplet\_5-B3LYP-def2-qzvpp

|    |           |           |           |
|----|-----------|-----------|-----------|
| Sn | -0.627731 | -0.001733 | -0.000002 |
| H  | 2.037158  | 1.051528  | 0.000025  |
| N  | 2.815432  | -0.076364 | 0.000006  |
| C  | 1.606899  | -0.071725 | 0.000003  |

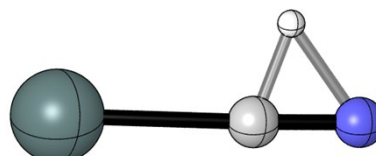

HCNSn\_triplet\_4\_HCNSn\_triplet\_9-B3LYP-def2-qzvpp

|    |           |           |          |
|----|-----------|-----------|----------|
| H  | -0.720285 | 1.654480  | 0.000001 |
| N  | 1.931400  | -0.255794 | 0.000000 |
| Sn | -0.009614 | 0.048244  | 0.000000 |
| C  | -2.053139 | -0.379352 | 0.000000 |

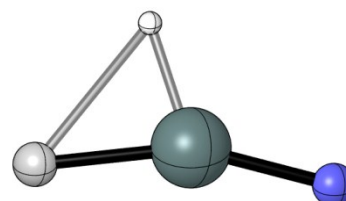

HCNSn\_triplet\_5\_HCNSn\_triplet\_7-B3LYP-def2-qzvpp

|    |           |           |          |
|----|-----------|-----------|----------|
| Sn | 0.000000  | 0.568661  | 0.000000 |
| C  | 0.619650  | -1.612954 | 0.000000 |
| N  | -0.455417 | -2.217100 | 0.000000 |
| H  | -0.529980 | -3.235632 | 0.000000 |

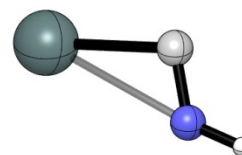

HCNSn\_triplet\_6\_HCNSn\_triplet\_9-B3LYP-def2-qzvpp

|    |           |           |           |
|----|-----------|-----------|-----------|
| H  | 0.870376  | 1.581849  | 0.000178  |
| N  | 1.869456  | -0.410206 | 0.000042  |
| Sn | -0.023725 | 0.064010  | -0.000016 |
| C  | -2.128390 | -0.318485 | 0.000057  |

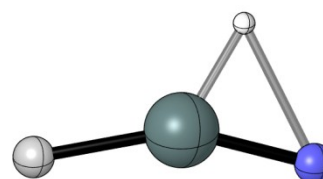

HCNSn\_triplet\_6\_HCNSn\_triplet\_7-B3LYP-def2-qzvpp

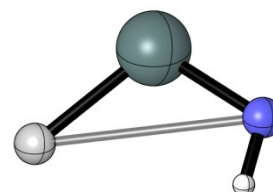



|    |           |           |           |
|----|-----------|-----------|-----------|
| H  | 1.440093  | 1.753694  | 0.000327  |
| C  | -1.669617 | 1.180302  | 0.000098  |
| N  | 1.628871  | 0.745861  | 0.000168  |
| Sn | -0.056490 | -0.281131 | -0.000042 |

HCNSn\_triplet\_8\_HCNSn\_triplet\_9-B3LYP-def2-qzvpp

|    |           |           |           |
|----|-----------|-----------|-----------|
| H  | -1.670574 | -0.741496 | 0.687306  |
| C  | 1.341715  | 1.267126  | 0.081374  |
| N  | 1.373841  | -1.149976 | 0.009869  |
| Sn | -0.319932 | 0.023771  | -0.024893 |

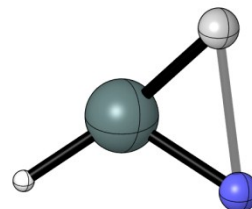

CNPb\_doublet\_1-B3LYP-def2-qzvpp

|    |           |           |          |
|----|-----------|-----------|----------|
| N  | -0.008848 | -3.039857 | 0.000000 |
| C  | 0.010322  | -1.881774 | 0.000000 |
| Pb | 0.000000  | 0.397191  | 0.000000 |

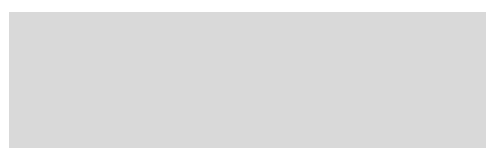

CNPb\_doublet\_2-B3LYP-def2-qzvpp

|    |          |          |           |
|----|----------|----------|-----------|
| C  | 0.000000 | 0.000000 | -3.004326 |
| N  | 0.000000 | 0.000000 | -1.829789 |
| Pb | 0.000000 | 0.000000 | 0.376030  |

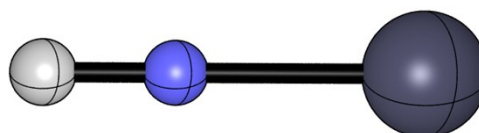

CNPb\_doublet\_3-B3LYP-def2-qzvpp

|    |           |           |          |
|----|-----------|-----------|----------|
| C  | 1.668569  | 1.335678  | 0.000000 |
| Pb | 0.000000  | 0.010349  | 0.000000 |
| N  | -1.430202 | -1.266097 | 0.000000 |

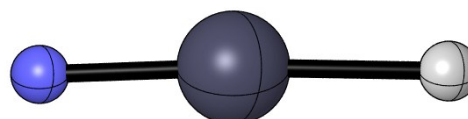

CNPb\_doublet\_ts1-B3LYP-def2-qzvpp

|    |           |           |          |
|----|-----------|-----------|----------|
| C  | 0.591949  | -1.943678 | 0.000000 |
| N  | -0.507385 | -2.347028 | 0.000000 |
| Pb | 0.000000  | 0.342576  | 0.000000 |

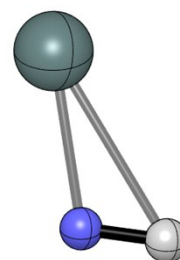

CNPb\_doublet\_ts2-B3LYP-def2-qzvpp

|    |           |           |          |
|----|-----------|-----------|----------|
| C  | 0.628841  | -2.141659 | 0.000000 |
| N  | -0.539006 | -2.034675 | 0.000000 |
| Pb | 0.000000  | 0.330399  | 0.000000 |

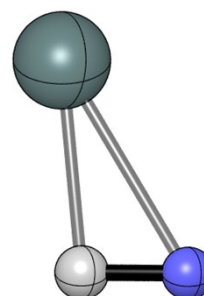

CNPb\_doublet\_ts3-def2-qzvpp-B3LYP

|    |           |           |          |
|----|-----------|-----------|----------|
| C  | 1.506304  | -1.496854 | 0.000000 |
| N  | -1.291118 | -1.321775 | 0.000000 |
| Pb | 0.000000  | 0.222360  | 0.000000 |

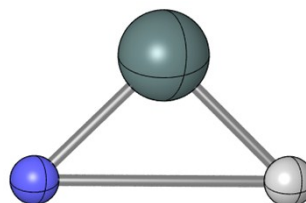

CNPb\_quartet\_1-B3LYP-def2-qzvpp

|    |          |          |           |
|----|----------|----------|-----------|
| N  | 0.000000 | 0.000000 | -3.025077 |
| C  | 0.000000 | 0.000000 | -1.856929 |
| Pb | 0.000000 | 0.000000 | 0.394111  |



CNPb\_quartet\_2-B3LYP-def2-qzvpp

|    |          |          |           |
|----|----------|----------|-----------|
| C  | 0.000000 | 0.000000 | -3.189310 |
| N  | 0.000000 | 0.000000 | -2.023152 |
| Pb | 0.000000 | 0.000000 | 0.406072  |

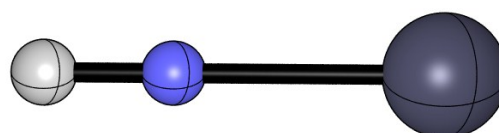

CNPb\_quartet\_3-B3LYP-def2-qzvpp

|    |          |          |           |
|----|----------|----------|-----------|
| C  | 0.000000 | 0.000000 | 2.189949  |
| Pb | 0.000000 | 0.000000 | 0.014207  |
| N  | 0.000000 | 0.000000 | -2.043518 |

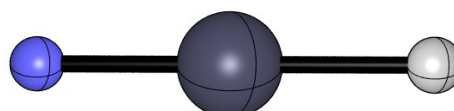

CNPb\_quartet\_4-B3LYP-def2-qzvpp

|    |           |           |          |
|----|-----------|-----------|----------|
| N  | -0.538206 | -2.378642 | 0.000000 |
| C  | 0.627907  | -2.503517 | 0.000000 |
| Pb | 0.000000  | 0.386239  | 0.000000 |

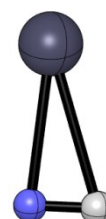

CNPb\_quartet\_ts1-def2-qzvpp-B3LYP

|    |           |           |          |
|----|-----------|-----------|----------|
| C  | 0.499330  | -2.432927 | 0.000000 |
| N  | -0.427997 | -3.136244 | 0.000000 |
| Pb | 0.000000  | 0.445747  | 0.000000 |

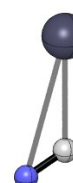

CNPb\_quartet\_ts2-def2-qzvpp-B3LYP

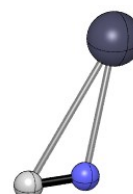

|    |           |           |          |
|----|-----------|-----------|----------|
| C  | 0.540907  | -2.983648 | 0.000000 |
| N  | -0.463635 | -2.397541 | 0.000000 |
| Pb | 0.000000  | 0.422984  | 0.000000 |

CNPb\_quartet\_ts3-def2-qzvpp-B3LYP

|    |           |           |          |
|----|-----------|-----------|----------|
| C  | 1.417358  | -1.492894 | 0.000000 |
| N  | -1.214879 | -1.762382 | 0.000000 |
| Pb | 0.000000  | 0.259683  | 0.000000 |

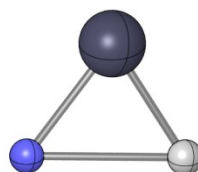

HCNPb\_singlet\_1-B3LYP-def2-qzvpp

|    |           |           |          |
|----|-----------|-----------|----------|
| N  | -0.210242 | -3.043361 | 0.000000 |
| H  | 1.847547  | 0.363927  | 0.000000 |
| C  | -0.062642 | -1.896487 | 0.000000 |
| Pb | 0.000000  | 0.394128  | 0.000000 |

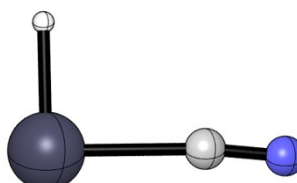

HCNPb\_singlet\_2-B3LYP-def2-qzvpp

|    |           |           |          |
|----|-----------|-----------|----------|
| H  | 1.851963  | 0.404534  | 0.000000 |
| Pb | 0.000000  | 0.370471  | 0.000000 |
| N  | -0.026550 | -1.838990 | 0.000000 |
| C  | -0.277685 | -2.985033 | 0.000000 |

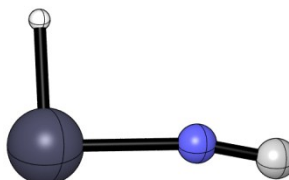

HCNPb\_singlet\_3-B3LYP-def2-qzvpp

|    |           |           |          |
|----|-----------|-----------|----------|
| C  | 0.001002  | -3.113953 | 0.000000 |
| H  | 0.003050  | -4.178537 | 0.000000 |
| N  | -0.001295 | -1.959713 | 0.000000 |
| Pb | 0.000000  | 0.446101  | 0.000000 |

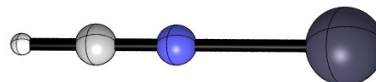

HCNPb\_singlet\_4-B3LYP-def2-qzvpp

|    |           |           |          |
|----|-----------|-----------|----------|
| H  | 2.386699  | -1.044619 | 0.000000 |
| Pb | 0.000000  | 0.027289  | 0.000000 |
| C  | 1.403542  | -1.556419 | 0.000000 |
| N  | -1.543993 | 1.163635  | 0.000000 |

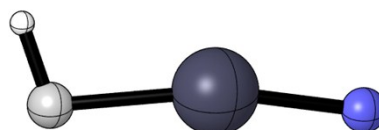

HCNPb\_singlet\_5-B3LYP-def2-qzvpp

|    |           |           |          |
|----|-----------|-----------|----------|
| N  | -0.103102 | -2.984544 | 0.000000 |
| H  | 0.701466  | -3.613050 | 0.000000 |
| C  | 0.003374  | -1.780359 | 0.000000 |
| Pb | 0.000000  | 0.429110  | 0.000000 |

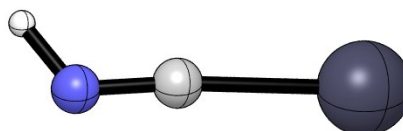

HCNPb\_singlet\_6-B3LYP-def2-qzvpp

|   |           |           |          |
|---|-----------|-----------|----------|
| H | -1.823972 | -1.666088 | 0.000000 |
|---|-----------|-----------|----------|

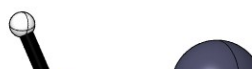

|    |           |           |          |
|----|-----------|-----------|----------|
| N  | -0.803674 | -1.774993 | 0.000000 |
| Pb | 0.000000  | 0.044752  | 0.000000 |
| C  | 1.241615  | 1.736897  | 0.000000 |

HCNPb\_singlet\_7-B3LYP-def2-qzvpp

|    |           |           |          |
|----|-----------|-----------|----------|
| H  | 1.306421  | -2.667461 | 0.000000 |
| C  | 0.564753  | -1.862827 | 0.000000 |
| N  | -0.670705 | -1.908334 | 0.000000 |
| Pb | 0.000000  | 0.331741  | 0.000000 |

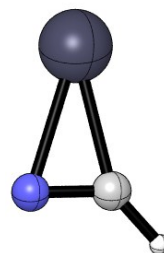

HCNPb\_singlet\_8-B3LYP-def2-qzvpp

|    |           |           |          |
|----|-----------|-----------|----------|
| H  | -1.182571 | -2.640033 | 0.000000 |
| N  | -0.484194 | -1.898167 | 0.000000 |
| C  | 0.761988  | -2.014280 | 0.000000 |
| Pb | 0.000000  | 0.341620  | 0.000000 |

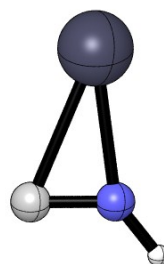

HCNPb\_singlet\_9-B3LYP-def2-qzvpp

|    |           |           |          |
|----|-----------|-----------|----------|
| H  | 1.296183  | -1.473066 | 0.000000 |
| N  | 0.454904  | -2.195941 | 0.000000 |
| C  | -0.746752 | -2.040384 | 0.000000 |
| Pb | 0.000000  | 0.354719  | 0.000000 |

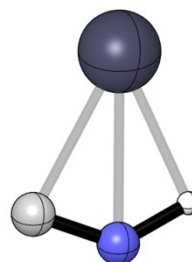

HCNPb\_singlet\_10-B3LYP-def2-qzvpp

|    |           |           |           |
|----|-----------|-----------|-----------|
| H  | 1.619161  | 1.010947  | 0.000152  |
| C  | 3.316895  | -0.152692 | 0.000005  |
| N  | 2.150860  | 0.074792  | 0.000120  |
| Pb | -0.446056 | -0.007541 | -0.000012 |

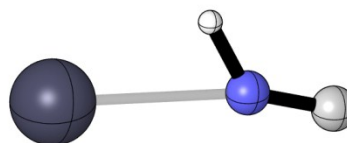

HCNPb\_singlet\_11-B3LYP-def2-qzvpp

|    |           |           |          |
|----|-----------|-----------|----------|
| H  | 1.448633  | -1.443285 | 0.000000 |
| Pb | 0.000000  | 0.341568  | 0.000000 |
| C  | 0.526875  | -2.172731 | 0.000000 |
| N  | -0.658555 | -1.932700 | 0.000000 |

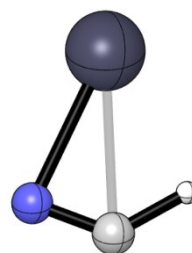

HCNPb\_singlet\_1\_HCNPb\_singlet\_2-B3LYP-def2-

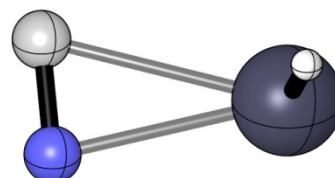

|       |           |           |           |
|-------|-----------|-----------|-----------|
| qzvpp |           |           |           |
| H     | 0.433988  | 0.351295  | 1.793598  |
| C     | -2.142993 | 0.610213  | -0.083351 |
| N     | -2.035913 | -0.544449 | 0.086477  |
| Pb    | 0.325309  | -0.002456 | -0.023156 |

HCNPb\_singlet\_1\_HCNPb\_singlet\_5-B3LYP-def2-

|       |           |           |          |
|-------|-----------|-----------|----------|
| qzvpp |           |           |          |
| H     | 1.015855  | -2.236687 | 0.000000 |
| C     | -0.160453 | -1.901094 | 0.000000 |
| N     | -0.007591 | -3.097180 | 0.000000 |
| Pb    | 0.000000  | 0.430774  | 0.000000 |

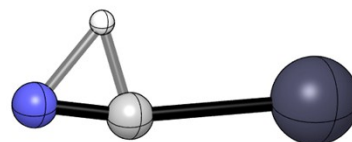

HCNPb\_singlet\_1\_HCNPb\_singlet\_7-B3LYP-def2-

|       |           |           |           |
|-------|-----------|-----------|-----------|
| qzvpp |           |           |           |
| H     | 1.682630  | 1.111656  | 0.000011  |
| C     | 2.422241  | 0.293298  | -0.000005 |
| N     | 3.423519  | -0.275242 | 0.000002  |
| Pb    | -0.490009 | -0.011521 | 0.000000  |

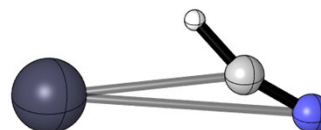

HCNPb\_singlet\_2\_HCNPb\_singlet\_11-B3LYP-def2-

|       |           |           |          |
|-------|-----------|-----------|----------|
| qzvpp |           |           |          |
| H     | 1.430074  | -1.127425 | 0.000000 |
| C     | 0.526477  | -2.161799 | 0.000000 |
| N     | -0.655562 | -1.886685 | 0.000000 |
| Pb    | 0.000000  | 0.332988  | 0.000000 |

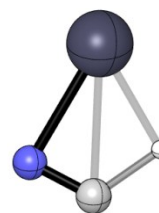

HCNPb\_singlet\_2\_HCNPb\_singlet\_9-B3LYP-def2-

|       |           |           |           |
|-------|-----------|-----------|-----------|
| qzvpp |           |           |           |
| H     | -1.241733 | 1.310059  | 0.000025  |
| C     | -2.005317 | -0.730340 | -0.000015 |
| N     | -2.164484 | 0.467946  | 0.000008  |
| Pb    | 0.346647  | -0.002483 | 0.000000  |

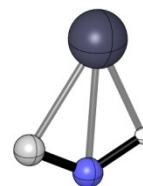

HCNPb\_singlet\_3\_HCNPb\_singlet\_10-B3LYP-def2-

|       |           |           |           |
|-------|-----------|-----------|-----------|
| qzvpp |           |           |           |
| H     | 2.589562  | 1.019495  | 0.000011  |
| C     | 3.180179  | -0.138351 | 0.000014  |
| N     | 1.974186  | -0.004874 | -0.000020 |
| Pb    | -0.432804 | -0.001894 | 0.000001  |

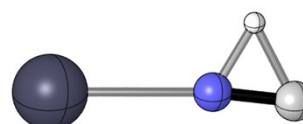

HCNPb\_singlet\_3\_HCNPb\_singlet\_7-B3LYP-def2-

|       |          |          |          |
|-------|----------|----------|----------|
| qzvpp |          |          |          |
| H     | 3.770299 | 1.091928 | 0.000037 |

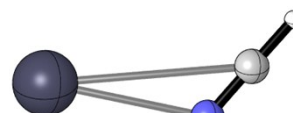

|    |           |           |           |
|----|-----------|-----------|-----------|
| C  | 3.058967  | 0.296970  | -0.000012 |
| N  | 2.303276  | -0.562609 | 0.000005  |
| Pb | -0.466427 | 0.012982  | 0.000000  |

HCNPb\_singlet\_4\_HCNPb\_singlet\_6-B3LYP-def2-qzvpp

|    |           |           |           |
|----|-----------|-----------|-----------|
| N  | -1.945293 | -0.386066 | 0.000111  |
| C  | 2.110719  | -0.329121 | 0.000107  |
| H  | -0.681180 | 1.686186  | -0.000071 |
| Pb | 0.019926  | 0.036476  | -0.000016 |

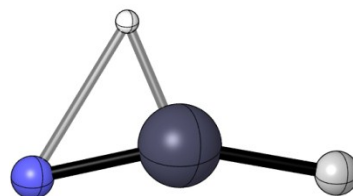

HCNPb\_singlet\_4\_HCNPb\_singlet\_7-B3LYP-def2-qzvpp

|    |           |           |           |
|----|-----------|-----------|-----------|
| H  | -2.348946 | 0.677765  | 0.865180  |
| C  | -2.048416 | 0.400146  | -0.167674 |
| N  | 0.681026  | 1.753295  | -0.011592 |
| Pb | 0.120393  | -0.187216 | 0.002707  |

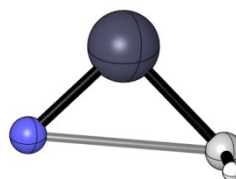

HCNPb\_singlet\_5\_HCNPb\_singlet\_8-B3LYP-def2-qzvpp

|    |           |           |           |
|----|-----------|-----------|-----------|
| H  | 3.077158  | -0.756558 | 0.470569  |
| C  | 1.861810  | 0.740756  | 0.019166  |
| N  | 2.315264  | -0.389041 | -0.099943 |
| Pb | -0.371401 | -0.011765 | 0.001391  |

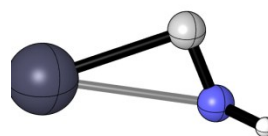

HCNPb\_singlet\_6\_HCNPb\_singlet\_8-B3LYP-def2-qzvpp

|    |           |           |           |
|----|-----------|-----------|-----------|
| H  | -1.925249 | 1.338598  | 0.674191  |
| C  | 1.280819  | 1.649755  | -0.026615 |
| N  | -1.789381 | 0.700123  | -0.117907 |
| Pb | 0.082512  | -0.196805 | 0.003791  |

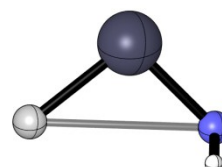

HCNPb\_singlet\_7\_HCNPb\_singlet\_11-B3LYP-def2-qzvpp

|    |           |           |          |
|----|-----------|-----------|----------|
| H  | 1.537284  | -1.799268 | 0.000000 |
| C  | 0.514944  | -2.209560 | 0.000000 |
| N  | -0.660992 | -2.012712 | 0.000000 |
| Pb | 0.000000  | 0.355434  | 0.000000 |

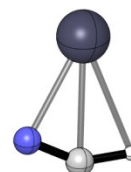

HCNPb\_singlet\_7\_HCNPb\_singlet\_8-B3LYP-def2-qzvpp

|   |           |           |          |
|---|-----------|-----------|----------|
| H | -0.008913 | -3.094821 | 0.000000 |
| C | 0.673865  | -2.021243 | 0.000000 |

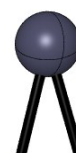

|    |           |           |          |
|----|-----------|-----------|----------|
| N  | -0.576325 | -2.027390 | 0.000000 |
| Pb | 0.000000  | 0.358707  | 0.000000 |

HCNPb\_singlet\_8\_HCNPb\_singlet\_10-B3LYP-def2-qzvpp

|    |           |           |           |
|----|-----------|-----------|-----------|
| H  | -1.699122 | 1.029270  | 0.000057  |
| C  | -3.389919 | -0.209785 | 0.000015  |
| N  | -2.260826 | 0.137685  | -0.000015 |
| Pb | 0.461761  | -0.008956 | -0.000001 |

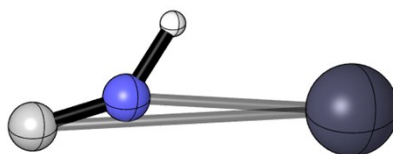

HCNPb\_singlet\_8\_HCNPb\_singlet\_9-B3LYP-def2-qzvpp

|    |           |           |          |
|----|-----------|-----------|----------|
| H  | 2.081406  | 1.438894  | 0.000002 |
| C  | 2.190546  | -0.751485 | 0.000000 |
| N  | 2.223006  | 0.441728  | 0.000000 |
| Pb | -0.375436 | -0.000269 | 0.000000 |

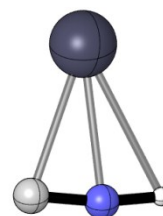

HCNPb\_triplet\_1-B3LYP-def2-qzvpp

|    |           |           |          |
|----|-----------|-----------|----------|
| H  | 1.667981  | 1.147313  | 0.000000 |
| Pb | 0.000000  | 0.376877  | 0.000000 |
| C  | -0.076397 | -1.844452 | 0.000000 |
| N  | -0.172800 | -2.997791 | 0.000000 |

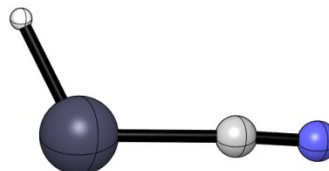

HCNPb\_triplet\_2-B3LYP-def2-qzvpp

|    |           |           |          |
|----|-----------|-----------|----------|
| H  | 1.784491  | 0.977089  | 0.000000 |
| Pb | 0.000000  | 0.363156  | 0.000000 |
| C  | -0.191699 | -2.995672 | 0.000000 |
| N  | -0.090614 | -1.825981 | 0.000000 |

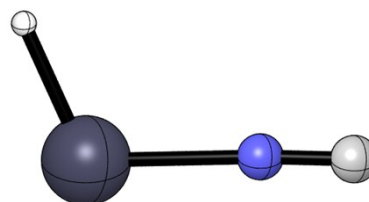

HCNPb\_triplet\_3-B3LYP-def2-qzvpp

|    |           |           |          |
|----|-----------|-----------|----------|
| H  | 0.010137  | -4.237795 | 0.000000 |
| C  | 0.002504  | -3.172602 | 0.000000 |
| N  | -0.003595 | -2.023850 | 0.000000 |
| Pb | 0.000000  | 0.456590  | 0.000000 |

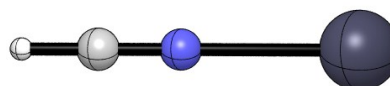

HCNPb\_triplet\_4-B3LYP-def2-qzvpp

|    |          |           |          |
|----|----------|-----------|----------|
| H  | 2.797969 | -0.163355 | 0.000000 |
| C  | 1.876501 | -0.750331 | 0.000000 |
| Pb | 0.000000 | 0.067802  | 0.000000 |

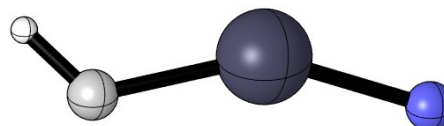

|   |           |           |          |
|---|-----------|-----------|----------|
| N | -2.008139 | -0.127774 | 0.000000 |
|---|-----------|-----------|----------|

HCNPb\_triplet\_5-B3LYP-def2-qzvpp

|    |          |          |           |
|----|----------|----------|-----------|
| H  | 0.000000 | 0.000000 | -4.069390 |
| N  | 0.000000 | 0.000000 | -3.074825 |
| C  | 0.000000 | 0.000000 | -1.905893 |
| Pb | 0.000000 | 0.000000 | 0.451567  |

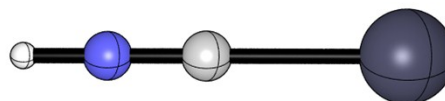

HCNPb\_triplet\_6-B3LYP-def2-qzvpp

|    |           |           |          |
|----|-----------|-----------|----------|
| H  | -2.377522 | -0.941089 | 0.000000 |
| N  | -1.424460 | -1.310627 | 0.000000 |
| Pb | 0.000000  | 0.062983  | 0.000000 |
| C  | 2.058123  | 0.825141  | 0.000000 |

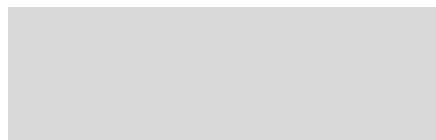

HCNPb\_triplet\_7-B3LYP-def2-qzvpp

|    |           |           |           |
|----|-----------|-----------|-----------|
| C  | -2.144743 | -0.575213 | 0.184528  |
| N  | -1.962673 | 0.564926  | -0.089407 |
| Pb | 0.310532  | -0.013684 | -0.024838 |
| H  | 1.143578  | 0.618841  | 1.555405  |

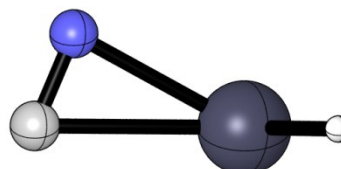

HCNPb\_triplet\_8-def2-qzvpp-B3LYP

|    |           |           |          |
|----|-----------|-----------|----------|
| H  | -0.429329 | 1.821515  | 0.000000 |
| Pb | 0.000000  | 0.095655  | 0.000000 |
| N  | -1.745259 | -1.049241 | 0.000000 |
| C  | 2.107691  | -0.386757 | 0.000000 |

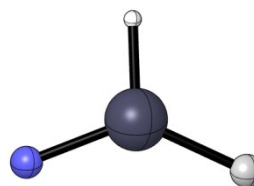

HCNPb\_triplet\_1\_HCNPb\_triplet\_3-B3LYP-def2-qzvpp

|    |           |           |           |
|----|-----------|-----------|-----------|
| C  | 1.890065  | -0.077518 | 0.000051  |
| N  | 3.050972  | -0.025928 | 0.000079  |
| H  | 0.454114  | 1.973720  | -0.000050 |
| Pb | -0.404284 | -0.016184 | -0.000010 |

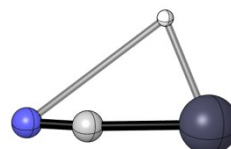

HCNPb\_triplet\_1\_HCNPb\_triplet\_7-B3LYP-def2-qzvpp

|    |           |           |           |
|----|-----------|-----------|-----------|
| H  | 1.118882  | 1.092269  | 1.313978  |
| C  | -2.096154 | -0.569116 | 0.252911  |
| N  | -2.053641 | 0.549522  | -0.156970 |
| Pb | 0.315043  | -0.018588 | -0.021130 |

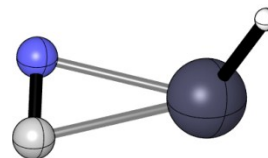

HCNPb\_triplet\_1\_HCNPb\_triplet\_8-B3LYP-def2-qzvpp

|   |           |           |           |
|---|-----------|-----------|-----------|
| H | 0.956218  | -1.638893 | -0.000280 |
| C | -0.338453 | 1.930477  | 0.000237  |
| N | -1.990749 | -0.480239 | 0.000227  |

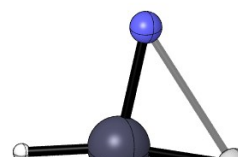



Pb 0.183046 -0.080272 -0.000033

HCNPb\_triplet\_2\_HCNPb\_triplet\_7-B3LYP-def2-qzvpp

H 1.168616 0.527173 1.586469  
C -2.358016 -0.503448 0.171359  
N -1.887617 0.552478 -0.090982  
Pb 0.319424 -0.016754 -0.024119

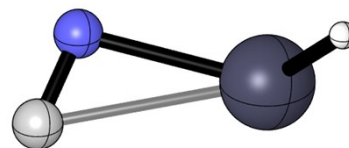

HCNPb\_triplet\_3\_HCNPb\_triplet\_5-B3LYP-def2-qzvpp\*

H -1.016473 1.681311 0.000029  
C -2.812589 0.245262 -0.000003  
N -1.861974 -0.448966 -0.000022  
Pb 0.377144 -0.000123 0.000002

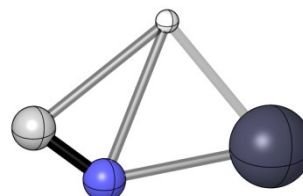

HCNPb\_triplet\_3\_HCNPb\_triplet\_5-B3LYP-def2-qzvpp

H 2.337958 1.043336 0.000025  
N 3.147272 -0.060088 0.000007  
C 1.946221 -0.097048 0.000003  
Pb -0.439588 -0.000493 -0.000001

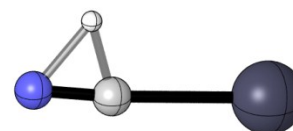

HCNPb\_triplet\_4\_HCNPb\_triplet\_8-B3LYP-def2-qzvpp

H -0.522904 1.779575 0.000039  
C -2.118404 -0.424604 0.000013  
N 2.006293 -0.315927 0.000013  
Pb -0.009887 0.036336 -0.000003

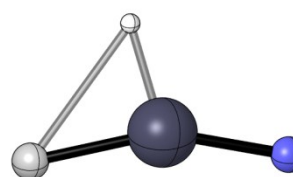

HCNPb\_triplet\_6\_HCNPb\_triplet\_8-B3LYP-def2-qzvpp

H 0.877439 -1.657046 -0.000124  
N 1.939398 0.633642 -0.000018  
C -2.167003 0.558118 -0.000028  
Pb -0.017698 -0.074721 0.000005

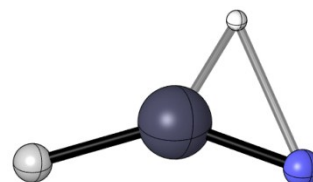

HCNPb\_triplet\_7\_HCNPb\_triplet\_8-B3LYP-def2-qzvpp

H 0.802504 -0.061646 1.717110  
C -1.161210 1.740769 0.033950  
N -1.833450 -1.008822 0.048174  
Pb 0.231694 -0.040503 -0.027537

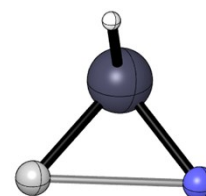

Supplement: c9ra08943h1.pdf [file c9ra08943h1.pdf]
